# Supplementary material for: In situ dissecting the evolution of gene duplication with different histone modification patterns based on high-throughput data analysis in Arabidopsis thaliana
Source: PeerJ. 2021 Jan 5;9:e10426. doi: 10.7717/peerj.10426 (PMC7792519; doi:10.7717/peerj.10426)
Supplement: Supplemental Information 1 [file peerj-09-10426-s001.xlsx]

## Sheet: Dataset S1
Dataset S1
Sample	Series	Treatment	Conditions	Tissue	Publication
SRR513593	SRA036590	5dpi Pst Col-0 run 1 replicate 1	CM_mu		Widespread dynamic DNA methylation in response to biotic stress
SRR513594	SRA036590	5dpi Pst Col-0 run 2 replicate 1	CM_mu		Widespread dynamic DNA methylation in response to biotic stress
SRR513595	SRA036590	5dpi Pst Col-0 run 2 replicate 1	CM_mu		Widespread dynamic DNA methylation in response to biotic stress
SRR513596	SRA036590	5dpi Pst Col-0 run 1 replicate 2	CM_mu		Widespread dynamic DNA methylation in response to biotic stress
SRR513597	SRA036590	5dpi Pst Col-0 run 2 replicate 2	CM_mu		Widespread dynamic DNA methylation in response to biotic stress
SRR578941	GSE41302	ddm1_exp1	CM_mu	Root	The Arabidopsis nucleosome remodeler DDM1 allows DNA methyltransferases to access H1-containing heterochromatin
SRR578942	GSE41302	ddm1_exp2	CM_mu	Root	The Arabidopsis nucleosome remodeler DDM1 allows DNA methyltransferases to access H2-containing heterochromatin
SRR578943	GSE41302	drd1_exp1	CM_mu	Root	The Arabidopsis nucleosome remodeler DDM1 allows DNA methyltransferases to access H3-containing heterochromatin
SRR578944	GSE41302	drd1_exp2	CM_mu		The Arabidopsis nucleosome remodeler DDM1 allows DNA methyltransferases to access H4-containing heterochromatin
SRR1634277	GSE62799	frg1/2 (replicate 1)	CM_mu	Aerial tissue	SNF2 chromatin remodeler-family proteins FRG1 and -2 are required for RNA-directed DNA methylation
SRR1634278	GSE62799	frg1/2 (replicate 2)	CM_mu	Aerial tissue	SNF2 chromatin remodeler-family proteins FRG1 and -3 are required for RNA-directed DNA methylation
SRR1634279	GSE62799	frg1/2 (replicate 3)	CM_mu	Aerial tissue	SNF2 chromatin remodeler-family proteins FRG1 and -4 are required for RNA-directed DNA methylation
SRR1005387	GSE51304	drm12_mRNA_rep1	CM_mu	Leaf	Non-CG methylation patterns shape the epigenetic landscape in Arabidopsis
SRR1005388	GSE51304	drm12_mRNA_rep2	CM_mu	Leaf	Non-CG methylation patterns shape the epigenetic landscape in Arabidopsis
SRR1005389	GSE51304	cmt2_mRNA_rep1	CM_mu	Leaf	Non-CG methylation patterns shape the epigenetic landscape in Arabidopsis
SRR1005390	GSE51304	cmt2_mRNA_rep2	CM_mu	Leaf	Non-CG methylation patterns shape the epigenetic landscape in Arabidopsis
SRR1005391	GSE51304	cmt3_mRNA_rep1	CM_mu	Leaf	Non-CG methylation patterns shape the epigenetic landscape in Arabidopsis
SRR1005392	GSE51304	cmt3_mRNA_rep2	CM_mu	Leaf	Non-CG methylation patterns shape the epigenetic landscape in Arabidopsis
SRR1005393	GSE51304	cmt23_mRNA_rep1	CM_mu	Leaf	Non-CG methylation patterns shape the epigenetic landscape in Arabidopsis
SRR1005394	GSE51304	cmt23_mRNA_rep2	CM_mu	Leaf	Non-CG methylation patterns shape the epigenetic landscape in Arabidopsis
SRR1005395	GSE51304	drm12cmt2_mRNA_rep1	CM_mu	Leaf	Non-CG methylation patterns shape the epigenetic landscape in Arabidopsis
SRR1005396	GSE51304	drm12cmt2_mRNA_rep2	CM_mu	Leaf	Non-CG methylation patterns shape the epigenetic landscape in Arabidopsis
SRR1005397	GSE51304	drm12cmt3_mRNA_rep1	CM_mu	Leaf	Non-CG methylation patterns shape the epigenetic landscape in Arabidopsis
SRR1005398	GSE51304	drm12cmt3_mRNA_rep2	CM_mu	Leaf	Non-CG methylation patterns shape the epigenetic landscape in Arabidopsis
SRR1005399	GSE51304	drm12cmt23_mRNA_rep1	CM_mu	Leaf	Non-CG methylation patterns shape the epigenetic landscape in Arabidopsis
SRR1005400	GSE51304	drm12cmt23_mRNA_rep2	CM_mu	Leaf	Non-CG methylation patterns shape the epigenetic landscape in Arabidopsis
SRR1342204	GSE58029	suvr5-1	CM_mu	Leaf	The SET-domain protein SUVR5 mediates H3K9me2 deposition and silencing at stimulus response genes in a DNA methylation-independent manner
SRR1342205	GSE58029	ldl1 ldl2	CM_mu	Leaf	The SET-domain protein SUVR5 mediates H3K9me3 deposition and silencing at stimulus response genes in a DNA methylation-independent manner
SRR1342206	GSE58029	suvr5 ldl1 ldl2	CM_mu	Leaf	The SET-domain protein SUVR5 mediates H3K9me5 deposition and silencing at stimulus response genes in a DNA methylation-independent manner
SRR349698	GSE32284	mRNASeq_ibm1_3	CM_mu	Leaf	IBM1, a JmjC domain-containing histone demethylase, is involved in the regulation of RNA-directed DNA methylation through the epigenetic control of RDR2 and DCL4 expression in Arabidopsi
SRR942023	GSE49090	jmj14	CM_mu	Leaf	Interplay between active chromatin marks and RNA-directed DNA methylation in Arabidopsis thaliana
SRR942024	GSE49090	jmj14 ldl1 ldl2	CM_mu	Leaf	Interplay between active chromatin marks and RNA-directed DNA methylation in Arabidopsis thaliana
SRR942025	GSE49090	ldl1 ldl2	CM_mu	Leaf	Interplay between active chromatin marks and RNA-directed DNA methylation in Arabidopsis thaliana
SRR501598	GSE38286	atxr56_seedling_RNAseq_setB	CM_mu	Seedling	DNA methyltransferases are required to induce heterochromatic re-replication in Arabidopsis
SRR501599	GSE38286	atxr56_seedling_RNAseq_setC	CM_mu	Seedling	DNA methyltransferases are required to induce heterochromatic re-replication in Arabidopsis
SRR501604	GSE38286	ddm1_seedling_RNAseq_setA	CM_mu	Seedling	DNA methyltransferases are required to induce heterochromatic re-replication in Arabidopsis
SRR501605	GSE38286	ddm1_seedling_RNAseq_setC	CM_mu	Seedling	DNA methyltransferases are required to induce heterochromatic re-replication in Arabidopsis
SRR501600	GSE38286	met1_seedling_RNAseq_setC	CM_mu	Seedling	DNA methyltransferases are required to induce heterochromatic re-replication in Arabidopsis
SRR501601	GSE38286	met1_seedling_RNAseq_setD	CM_mu	Seedling	DNA methyltransferases are required to induce heterochromatic re-replication in Arabidopsis
SRR501606	GSE38286	cmt3_seedling_RNAseq_setA	CM_mu	Seedling	DNA methyltransferases are required to induce heterochromatic re-replication in Arabidopsis
SRR501607	GSE38286	cmt3_seedling_RNAseq_setC	CM_mu	Seedling	DNA methyltransferases are required to induce heterochromatic re-replication in Arabidopsis
SRR501602	GSE38286	drm12_seedling_RNAseq_setB	CM_mu		DNA methyltransferases are required to induce heterochromatic re-replication in Arabidopsis
SRR501603	GSE38286	drm12_seedling_RNAseq_setC	CM_mu		DNA methyltransferases are required to induce heterochromatic re-replication in Arabidopsis
SRR501618	GSE38286	ddm1atxr56_seedling_RNAseq_setC	CM_mu		DNA methyltransferases are required to induce heterochromatic re-replication in Arabidopsis
SRR501612	GSE38286	met1atxr56_seedling_RNAseq_setB	CM_mu		DNA methyltransferases are required to induce heterochromatic re-replication in Arabidopsis
SRR501613	GSE38286	met1atxr56_seedling_RNAseq_setC	CM_mu		DNA methyltransferases are required to induce heterochromatic re-replication in Arabidopsis
SRR501619	GSE38286	cmt3atxr56_seedling_RNAseq_setA	CM_mu		DNA methyltransferases are required to induce heterochromatic re-replication in Arabidopsis
SRR501620	GSE38286	cmt3atxr56_seedling_RNAseq_setC	CM_mu		DNA methyltransferases are required to induce heterochromatic re-replication in Arabidopsis
SRR501614	GSE38286	drm12atxr56_seedling_RNAseq_setB	CM_mu		DNA methyltransferases are required to induce heterochromatic re-replication in Arabidopsis
SRR501615	GSE38286	drm12atxr56_seedling_RNAseq_setC	CM_mu		DNA methyltransferases are required to induce heterochromatic re-replication in Arabidopsis
ERR274310	ERP002617	no salt treatment	Normal	Shoot	Hyperosmotic priming of Arabidopsis thaliana seedlings establishes a long-term somatic memory accompanied by specific changes of the epigenome
ERR274309	ERP002617	no salt treatment	Normal	Root	Hyperosmotic priming of Arabidopsis thaliana seedlings establishes a long-term somatic memory accompanied by specific changes of the epigenome
SRR671946	GSE44062	KCl_Control_rep1	Normal	Root	Integrated RNA-seq and sRNA-seq analysis identifies novel nitrate-responsive genes in Arabidopsis thaliana roots
SRR671947	GSE44062	KCl_Control_rep2	Normal	Root	Integrated RNA-seq and sRNA-seq analysis identifies novel nitrate-responsive genes in Arabidopsis thaliana roots
SRR331227	SRA045009	control	Normal	Root	Mapping gene activity of Arabidopsis root hairs
SRR420815	SRA050356	control sample #3	Normal	Root	Complementary proteome and transcriptome profiling in phosphate-deficient Arabidopsis roots reveals multiple levels of gene regulation
SRR420814	SRA050356	control sample #2	Normal	Root	Complementary proteome and transcriptome profiling in phosphate-deficient Arabidopsis roots reveals multiple levels of gene regulation
SRR420813	SRA050356	control sample #1	Normal	Root	Complementary proteome and transcriptome profiling in phosphate-deficient Arabidopsis roots reveals multiple levels of gene regulation
SRR493097	SRA036590	Col-0 Untreated run 1 replicate 1	Normal		Widespread dynamic DNA methylation in response to biotic stress
SRR493098	SRA036590	Col-0 Untreated run 1 replicate 2	Normal		Widespread dynamic DNA methylation in response to biotic stress
SRR493101	SRA036590	Col-0 Untreated run 2 replicate 2	Normal		Widespread dynamic DNA methylation in response to biotic stress
SRR1342203	GSE58029	Col0	Normal	Leaf	The SET-domain protein SUVR5 mediates H3K9me4 deposition and silencing at stimulus response genes in a DNA methylation-independent manner
SRR349697	GSE32284	mRNASeq_WT_Col_0	Normal	Leaf	IBM1, a JmjC domain-containing histone demethylase, is involved in the regulation of RNA-directed DNA methylation through the epigenetic control of RDR2 and DCL3 expression in Arabidopsi
SRR942022	GSE49090	Col	Normal	Leaf	Interplay between active chromatin marks and RNA-directed DNA methylation in Arabidopsis thaliana
SRR501595	GSE38286	WT_seedling_RNAseq_setA	Normal	Seedling	DNA methyltransferases are required to induce heterochromatic re-replication in Arabidopsis
SRR501596	GSE38286	WT_seedling_RNAseq_setB	Normal	Seedling	DNA methyltransferases are required to induce heterochromatic re-replication in Arabidopsis
SRR501594	GSE38286	WT_seedling_RNAseq_setC	Normal	Seedling	DNA methyltransferases are required to induce heterochromatic re-replication in Arabidopsis
SRR501597	GSE38286	WT_seedling_RNAseq_setD	Normal	Seedling	DNA methyltransferases are required to induce heterochromatic re-replication in Arabidopsis
ERR274311	ERP002617	transient mild salt treatment	Stress	Shoot	Hyperosmotic priming of Arabidopsis thaliana seedlings establishes a long-term somatic memory accompanied by specific changes of the epigenome
ERR274308	ERP002617	transient mild salt treatment	Stress	Root	Hyperosmotic priming of Arabidopsis thaliana seedlings establishes a long-term somatic memory accompanied by specific changes of the epigenome
SRR069558	GSE24696	Copper-deficient	Stress	Shoot	Transcriptome sequencing identifies SPL7-regulated copper acquisition genes FRO4/FRO7 and the copper dependence of iron homeostasis in Arabidopsis
SRR069559	GSE24696	Copper-deficient	Stress	Shoot	Transcriptome sequencing identifies SPL7-regulated copper acquisition genes FRO4/FRO8 and the copper dependence of iron homeostasis in Arabidopsis
SRR069568	GSE24696	Copper-deficient	Stress	Root	Transcriptome sequencing identifies SPL7-regulated copper acquisition genes FRO4/FRO12 and the copper dependence of iron homeostasis in Arabidopsis
SRR069569	GSE24696	Copper-deficient	Stress	Root	Transcriptome sequencing identifies SPL7-regulated copper acquisition genes FRO4/FRO13 and the copper dependence of iron homeostasis in Arabidopsis
SRR631034	GSE42899	Low Mg2+	Stress	Root	Magnesium availability regulates the development of root hairs in Arabidopsis thaliana (L.) Heynh
SRR631035	GSE42899	High Mg2+	Stress	Root	Magnesium availability regulates the development of root hairs in Arabidopsis thaliana (L.) Heynh
SRR671948	GSE44062	KNO3_Treatment_rep1	Stress	Root	Integrated RNA-seq and sRNA-seq analysis identifies novel nitrate-responsive genes in Arabidopsis thaliana roots
SRR671949	GSE44062	KNO3_Treatment_rep2	Stress	Root	Integrated RNA-seq and sRNA-seq analysis identifies novel nitrate-responsive genes in Arabidopsis thaliana roots
SRR331229	SRA045009	phosphate deficiency	Stress	Root	Mapping gene activity of Arabidopsis root hairs
SRR331228	SRA045009	iron deficiency	Stress	Root	Mapping gene activity of Arabidopsis root hairs
SRR420818	SRA050356	phosphate-deficient sample #3	Stress	Root	Complementary proteome and transcriptome profiling in phosphate-deficient Arabidopsis roots reveals multiple levels of gene regulation
SRR420817	SRA050356	phosphate-deficient sample #2	Stress	Root	Complementary proteome and transcriptome profiling in phosphate-deficient Arabidopsis roots reveals multiple levels of gene regulation
SRR420816	SRA050356	phosphate-deficient sample #1	Stress	Root	Complementary proteome and transcriptome profiling in phosphate-deficient Arabidopsis roots reveals multiple levels of gene regulation
SRR1976488	GSE67956	prolonged darkness for 72h S1	Stress	Leaf	The Impact of the Branched-Chain Ketoacid Dehydrogenase Complex on Amino Acid Homeostasis in Arabidopsis
SRR1976489	GSE67956	prolonged darkness for 72h S2	Stress	Leaf	The Impact of the Branched-Chain Ketoacid Dehydrogenase Complex on Amino Acid Homeostasis in Arabidopsis
ERR754069	ERP009505	Mild drought	Stress	Rosette leaf	Leaf Responses to Mild Drought Stress in Natural Variants of Arabidopsis thaliana
ERR754064	ERP009505	Mild drought	Stress	Rosette leaf	Leaf Responses to Mild Drought Stress in Natural Variants of Arabidopsis thaliana
ERR754059	ERP009505	Mild drought	Stress	Rosette leaf	Leaf Responses to Mild Drought Stress in Natural Variants of Arabidopsis thaliana

## Sheet: Dataset S2
ChIP-chip dataset used in this study
GEO accession	Mark
GSE24656	H2bub
GSE13613	H3K4me1
GSE24659	H3K4me2
GSE24658	H3K4me3
GSE24661	H3K36me3
GSE54489	H3K14ac
GSE54489	H3K9ac
GSE24662	H3K27me1
GSE24657	H3K27me3
GSE37075	H3K9me2
