# Supplementary material for: In situ dissecting the evolution of gene duplication with different histone modification patterns based on high-throughput data analysis in Arabidopsis thaliana
Source: PeerJ. 2021 Jan 5;9:e10426. doi: 10.7717/peerj.10426 (PMC7792519; doi:10.7717/peerj.10426)
Supplement: Supplemental Information 2 [file peerj-09-10426-s002.xlsx]

## Sheet: Sheet1
Dataset S2
Duplicate1	Location	Duplicate2	Location	Duplicate type
AT1G01030	at1:11649	AT2G46870	at2:19260918	WGD
AT1G01030	at1:11649	AT3G61970	at3:22951463	WGD
AT1G01050	at1:31170	AT2G46860	at2:19253688	WGD
AT1G01060	at1:33666	AT2G46830	at2:19246681	WGD
AT1G01100	at1:50090	AT4G00810	at4:345952	WGD
AT1G01110	at1:52869	AT4G00820	at4:349116	WGD
AT1G01120	at1:57269	AT2G46720	at2:19197383	WGD
AT1G01160	at1:72357	AT4G00850	at4:357551	WGD
AT1G01170	at1:73931	AT4G00860	at4:359315	WGD
AT1G01190	at1:83045	AT2G46660	at2:19153328	WGD
AT1G01190	at1:83045	AT3G61880	at3:22905868	WGD
AT1G01225	at1:95987	AT4G00905	at4:387865	WGD
AT1G01240	at1:99894	AT2G46550	at2:19111989	WGD
AT1G01260	at1:109032	AT2G46510	at2:19090953	WGD
AT1G01300	at1:116943	AT3G61820	at3:22879804	WGD
AT1G01340	at1:132330	AT2G46430	at2:19058294	WGD
AT1G01340	at1:132330	AT4G01010	at4:434569	WGD
AT1G01350	at1:136124	AT4G01023	at4:445844	WGD
AT1G01360	at1:141971	AT4G01026	at4:447052	WGD
AT1G01380	at1:147153	AT2G46410	at2:19049172	WGD
AT1G01380	at1:147153	AT4G01060	at4:460472	WGD
AT1G01390	at1:148120	AT4G01070	at4:461592	WGD
AT1G01430	at1:156801	AT4G01080	at4:466391	WGD
AT1G01440	at1:159856	AT2G46380	at2:19039202	WGD
AT1G01440	at1:159856	AT3G61670	at3:22818589	WGD
AT1G01440	at1:159856	AT4G01090	at4:470515	WGD
AT1G01453	at1:166618	AT2G46300	at2:19008291	WGD
AT1G01453	at1:166618	AT4G01110	at4:479963	WGD
AT1G01460	at1:168723	AT4G01190	at4:504211	WGD
AT1G01470	at1:172146	AT2G46140	at2:18959078	WGD
AT1G01480	at1:175782	AT3G61510	at3:22763495	WGD
AT1G01520	at1:190596	AT4G01280	at4:535241	WGD
AT1G01540	at1:195812	AT4G01330	at4:550420	WGD
AT1G01550	at1:199791	AT2G46080	at2:18948117	WGD
AT1G01550	at1:199791	AT3G61500	at3:22760541	WGD
AT1G01550	at1:199791	AT4G01360	at4:564760	WGD
AT1G01560	at1:202136	AT2G46070	at2:18945982	WGD
AT1G01560	at1:202136	AT4G01370	at4:567095	WGD
AT1G01570	at1:205176	AT4G00300	at4:128586	WGD
AT1G01600	at1:218994	AT2G45970	at2:18912260	WGD
AT1G01600	at1:218994	AT4G00360	at4:160768	WGD
AT1G01610	at1:221691	AT4G00400	at4:174062	WGD
AT1G01620	at1:225665	AT2G45960	at2:18910295	WGD
AT1G01620	at1:225665	AT3G61430	at3:22733474	WGD
AT1G01620	at1:225665	AT4G00430	at4:185853	WGD
AT1G01660	at1:240057	AT3G61390	at3:22716353	WGD
AT1G01670	at1:242843	AT2G45920	at2:18899084	WGD
AT1G01695	at1:252947	AT2G45900	at2:18886069	WGD
AT1G01695	at1:252947	AT3G61380	at3:22708482	WGD
AT1G01695	at1:252947	AT4G00440	at4:193879	WGD
AT1G01700	at1:259495	AT2G45890	at2:18883473	WGD
AT1G01700	at1:259495	AT4G00460	at4:211117	WGD
AT1G01710	at1:262828	AT4G00520	at4:227694	WGD
AT1G01725	at1:269792	AT4G00530	at4:232928	WGD
AT1G01780	at1:282761	AT2G45800	at2:18857941	WGD
AT1G01780	at1:282761	AT3G61230	at3:22664425	WGD
AT1G01790	at1:284610	AT4G00630	at4:261531	WGD
AT1G01800	at1:293342	AT3G61220	at3:22662953	WGD
AT1G01820	at1:296001	AT2G45740	at2:18839588	WGD
AT1G01820	at1:296001	AT3G61070	at3:22604094	WGD
AT1G01830	at1:298535	AT2G45720	at2:18834149	WGD
AT1G01960	at1:330588	AT3G60860	at3:22484804	WGD
AT1G02230	at1:435174	AT4G01520	at4:656407	WGD
AT1G02250	at1:437951	AT4G01550	at4:673862	WGD
AT1G02300	at1:453288	AT4G01610	at4:694695	WGD
AT1G02340	at1:465718	AT2G46970	at2:19295490	WGD
AT1G02360	at1:471990	AT4G01700	at4:732313	WGD
AT1G02370	at1:474500	AT4G01990	at4:871145	WGD
AT1G02380	at1:477000	AT4G01960	at4:851210	WGD
AT1G02390	at1:480852	AT4G01950	at4:844409	WGD
AT1G02430	at1:495050	AT2G47170	at2:19366623	WGD
AT1G02460	at1:504673	AT4G01890	at4:816210	WGD
AT1G02470	at1:511765	AT4G01883	at4:813068	WGD
AT1G02500	at1:518254	AT4G01850	at4:796097	WGD
AT1G02510	at1:520498	AT4G01840	at4:793261	WGD
AT1G02520	at1:523651	AT4G01820	at4:780734	WGD
AT1G02550	at1:536483	AT2G47340	at2:19432168	WGD
AT1G02570	at1:541335	AT2G47360	at2:19437800	WGD
AT1G02580	at1:544783	AT4G02020	at4:886600	WGD
AT1G02610	at1:553050	AT4G02075	at4:913419	WGD
AT1G02620	at1:557092	AT3G62560	at3:23137426	WGD
AT1G02620	at1:557092	AT4G02080	at4:921454	WGD
AT1G02650	at1:568704	AT2G47440	at2:19469719	WGD
AT1G02650	at1:568704	AT3G62570	at3:23142485	WGD
AT1G02650	at1:568704	AT4G02100	at4:930065	WGD
AT1G02660	at1:571955	AT3G62590	at3:23147918	WGD
AT1G02690	at1:584260	AT4G02150	at4:950611	WGD
AT1G02720	at1:591826	AT3G62660	at3:23172806	WGD
AT1G02750	at1:602497	AT4G02200	at4:972707	WGD
AT1G02780	at1:607808	AT4G02230	at4:979170	WGD
AT1G02800	at1:613216	AT4G02290	at4:1002394	WGD
AT1G02810	at1:618265	AT2G47550	at2:19508980	WGD
AT1G02810	at1:618265	AT4G02330	at4:1032413	WGD
AT1G02813	at1:620678	AT4G02360	at4:1041142	WGD
AT1G02820	at1:623765	AT4G02380	at4:1046343	WGD
AT1G02840	at1:626741	AT4G02430	at4:1068974	WGD
AT1G02890	at1:645092	AT4G02480	at4:1081759	WGD
AT1G02920	at1:658657	AT2G47730	at2:19556326	WGD
AT1G02920	at1:658657	AT3G62760	at3:23217425	WGD
AT1G02920	at1:658657	AT4G02520	at4:1110452	WGD
AT1G02980	at1:677869	AT4G02570	at4:1128618	WGD
AT1G02990	at1:681396	AT3G62900	at3:23248129	WGD
AT1G03010	at1:693480	AT2G47860	at2:19599948	WGD
AT1G03020	at1:698207	AT3G62930	at3:23261442	WGD
AT1G03040	at1:703906	AT4G02590	at4:1137498	WGD
AT1G03050	at1:707726	AT4G02650	at4:1156453	WGD
AT1G03060	at1:712473	AT4G02660	at4:1159667	WGD
AT1G03070	at1:729901	AT4G02690	at4:1185751	WGD
AT1G03080	at1:731611	AT2G47920	at2:19615777	WGD
AT1G03080	at1:731611	AT4G02710	at4:1193516	WGD
AT1G03103	at1:747197	AT2G48130	at2:19685066	WGD
AT1G03130	at1:753307	AT4G02770	at4:1229111	WGD
AT1G03170	at1:769632	AT4G02810	at4:1256162	WGD
AT1G03210	at1:782948	AT4G02850	at4:1266463	WGD
AT1G03290	at1:807361	AT4G02880	at4:1274465	WGD
AT1G03340	at1:819662	AT4G02920	at4:1292523	WGD
AT1G03365	at1:826569	AT4G03000	at4:1324136	WGD
AT1G03440	at1:852366	AT4G03010	at4:1329952	WGD
AT1G03445	at1:854410	AT4G03080	at4:1359655	WGD
AT1G03457	at1:860788	AT4G03110	at4:1376306	WGD
AT1G03470	at1:865915	AT4G03153	at4:1394845	WGD
AT1G03475	at1:869051	AT4G03205	at4:1412785	WGD
AT1G03520	at1:877862	AT4G03340	at4:1467727	WGD
AT1G03590	at1:894254	AT4G03415	at4:1503708	WGD
AT1G03610	at1:900887	AT4G03420	at4:1511839	WGD
AT1G03610	at1:900887	AT4G28150	at4:13977303	WGD
AT1G03660	at1:911436	AT4G03460	at4:1536404	WGD
AT1G03680	at1:916819	AT4G03520	at4:1562359	WGD
AT1G03700	at1:920950	AT4G03540	at4:1570042	WGD
AT1G03710	at1:923426	AT4G03565	at4:1586747	WGD
AT1G03730	at1:930828	AT4G03600	at4:1603702	WGD
AT1G03730	at1:930828	AT4G28330	at4:14022387	WGD
AT1G03740	at1:933512	AT5G44290	at5:17840424	WGD
AT1G03770	at1:944572	AT5G44280	at5:17835849	WGD
AT1G03780	at1:947520	AT5G44270	at5:17833636	WGD
AT1G03790	at1:954525	AT5G44260	at5:17829626	WGD
AT1G03800	at1:957261	AT5G44210	at5:17806472	WGD
AT1G03810	at1:958759	AT4G28440	at4:14059988	WGD
AT1G03840	at1:967503	AT5G44160	at5:17772941	WGD
AT1G03860	at1:979308	AT4G28510	at4:14084749	WGD
AT1G03860	at1:979308	AT5G44140	at5:17762491	WGD
AT1G03870	at1:982506	AT5G44130	at5:17761090	WGD
AT1G03880	at1:985751	AT4G28520	at4:14087556	WGD
AT1G03880	at1:985751	AT5G44120	at5:17756264	WGD
AT1G03905	at1:993400	AT5G44110	at5:17754064	WGD
AT1G03930	at1:1004769	AT4G28540	at4:14106959	WGD
AT1G03930	at1:1004769	AT5G44100	at5:17749118	WGD
AT1G03960	at1:1013715	AT5G44090	at5:17742766	WGD
AT1G03970	at1:1018100	AT5G44080	at5:17738652	WGD
AT1G03980	at1:1018570	AT5G44070	at5:17734738	WGD
AT1G03982	at1:1022251	AT4G28556	at4:14114104	WGD
AT1G03990	at1:1024847	AT4G28570	at4:14119425	WGD
AT1G04000	at1:1028106	AT5G44060	at5:17731005	WGD
AT1G04030	at1:1040383	AT5G44040	at5:17719659	WGD
AT1G04040	at1:1042362	AT5G44020	at5:17712409	WGD
AT1G04050	at1:1045598	AT5G43990	at5:17697686	WGD
AT1G04070	at1:1050553	AT5G43970	at5:17692807	WGD
AT1G04090	at1:1057151	AT5G43950	at5:17686500	WGD
AT1G04100	at1:1059506	AT4G28640	at4:14142130	WGD
AT1G04140	at1:1075543	AT5G43930	at5:17676823	WGD
AT1G04160	at1:1086495	AT4G28710	at4:14171998	WGD
AT1G04160	at1:1086495	AT5G43900	at5:17656894	WGD
AT1G04180	at1:1104623	AT4G28720	at4:14192583	WGD
AT1G04180	at1:1104623	AT5G43890	at5:17648857	WGD
AT1G04220	at1:1119699	AT5G43760	at5:17585763	WGD
AT1G04230	at1:1125518	AT5G43720	at5:17557166	WGD
AT1G04240	at1:1128188	AT3G23030	at3:8180768	WGD
AT1G04240	at1:1128188	AT4G14560	at4:8361058	WGD
AT1G04240	at1:1128188	AT5G43700	at5:17550233	WGD
AT1G04250	at1:1136258	AT4G14550	at4:8347822	WGD
AT1G04270	at1:1141604	AT5G43640	at5:17531302	WGD
AT1G04300	at1:1148659	AT5G43560	at5:17500410	WGD
AT1G04310	at1:1154764	AT3G23150	at3:8254663	WGD
AT1G04330	at1:1161311	AT3G23170	at3:8267942	WGD
AT1G04330	at1:1161311	AT4G14450	at4:8309474	WGD
AT1G04340	at1:1163097	AT3G23190	at3:8279289	WGD
AT1G04340	at1:1163097	AT4G14420	at4:8301946	WGD
AT1G04340	at1:1163097	AT5G43460	at5:17459873	WGD
AT1G04350	at1:1165165	AT5G43440	at5:17455233	WGD
AT1G04360	at1:1167457	AT5G43420	at5:17451669	WGD
AT1G04370	at1:1175177	AT3G23220	at3:8287950	WGD
AT1G04370	at1:1175177	AT5G43410	at5:17435010	WGD
AT1G04410	at1:1189078	AT5G43330	at5:17390433	WGD
AT1G04430	at1:1198508	AT3G23300	at3:8333025	WGD
AT1G04430	at1:1198508	AT4G14360	at4:8267660	WGD
AT1G04440	at1:1202255	AT3G23340	at3:8350803	WGD
AT1G04440	at1:1202255	AT4G14340	at4:8248286	WGD
AT1G04440	at1:1202255	AT5G43320	at5:17385867	WGD
AT1G04450	at1:1208521	AT2G33460	at2:14174590	WGD
AT1G04450	at1:1208521	AT3G23380	at3:8373947	WGD
AT1G04470	at1:1211049	AT2G33420	at2:14158705	WGD
AT1G04480	at1:1216095	AT2G33370	at2:14143554	WGD
AT1G04490	at1:1218005	AT2G33360	at2:14139982	WGD
AT1G04500	at1:1221433	AT2G33350	at2:14133929	WGD
AT1G04510	at1:1226575	AT2G33340	at2:14126217	WGD
AT1G04520	at1:1231578	AT2G33330	at2:14122890	WGD
AT1G04540	at1:1237256	AT2G33320	at2:14119526	WGD
AT1G04550	at1:1240375	AT2G33310	at2:14113025	WGD
AT1G04570	at1:1246728	AT2G33280	at2:14106410	WGD
AT1G04600	at1:1262123	AT2G33240	at2:14086942	WGD
AT1G04610	at1:1279388	AT2G33230	at2:14080411	WGD
AT1G04630	at1:1289734	AT2G33220	at2:14078851	WGD
AT1G04710	at1:1321904	AT2G33150	at2:14047478	WGD
AT1G04750	at1:1331466	AT2G32670	at2:13857877	WGD
AT1G04750	at1:1331466	AT2G33110	at2:14041038	WGD
AT1G04810	at1:1350180	AT2G32730	at2:13880046	WGD
AT1G04860	at1:1369054	AT2G32780	at2:13898431	WGD
AT1G04930	at1:1396291	AT2G32840	at2:13932904	WGD
AT1G04980	at1:1413644	AT2G32920	at2:13962318	WGD
AT1G04990	at1:1419141	AT2G32930	at2:13965990	WGD
AT1G05000	at1:1425601	AT2G32960	at2:13987767	WGD
AT1G05070	at1:1457063	AT2G32580	at2:13827436	WGD
AT1G05100	at1:1469610	AT2G32510	at2:13798821	WGD
AT1G05140	at1:1482548	AT2G32480	at2:13788517	WGD
AT1G05150	at1:1484067	AT2G32450	at2:13778449	WGD
AT1G05160	at1:1487378	AT2G32440	at2:13774588	WGD
AT1G05170	at1:1491111	AT2G32430	at2:13771296	WGD
AT1G05180	at1:1498114	AT2G32410	at2:13757593	WGD
AT1G05200	at1:1504960	AT2G32390	at2:13748441	WGD
AT1G05210	at1:1510404	AT2G32380	at2:13746611	WGD
AT1G05230	at1:1512901	AT2G32370	at2:13740878	WGD
AT1G05270	at1:1531641	AT2G32340	at2:13732247	WGD
AT1G05291	at1:1541348	AT2G32280	at2:13713036	WGD
AT1G05300	at1:1545106	AT2G32270	at2:13704221	WGD
AT1G05320	at1:1553608	AT2G32240	at2:13684299	WGD
AT1G05340	at1:1558844	AT2G32190	at2:13674498	WGD
AT1G05420	at1:1590073	AT2G32100	at2:13647852	WGD
AT1G05470	at1:1607357	AT2G32010	at2:13624792	WGD
AT1G05510	at1:1629446	AT2G31985	at2:13613928	WGD
AT1G05570	at1:1647706	AT2G31960	at2:13588887	WGD
AT1G05575	at1:1661691	AT2G31945	at2:13581581	WGD
AT1G05580	at1:1665464	AT2G31910	at2:13571044	WGD
AT1G05630	at1:1682318	AT2G31830	at2:13532776	WGD
AT1G05630	at1:1682318	AT2G43900	at2:18178588	WGD
AT1G05640	at1:1687436	AT2G31820	at2:13530350	WGD
AT1G05650	at1:1690264	AT2G43870	at2:18166615	WGD
AT1G05660	at1:1694286	AT2G43860	at2:18162945	WGD
AT1G05675	at1:1701116	AT2G31750	at2:13497233	WGD
AT1G05675	at1:1701116	AT2G43820	at2:18152227	WGD
AT1G05710	at1:1714950	AT2G31730	at2:13487568	WGD
AT1G05730	at1:1718555	AT2G31725	at2:13486317	WGD
AT1G05760	at1:1723734	AT2G43730	at2:18124648	WGD
AT1G05780	at1:1726608	AT2G31710	at2:13481793	WGD
AT1G05800	at1:1741204	AT2G31690	at2:13476093	WGD
AT1G05810	at1:1748314	AT2G31680	at2:13473594	WGD
AT1G05830	at1:1754244	AT2G31650	at2:13455272	WGD
AT1G05850	at1:1766503	AT2G43570	at2:18076224	WGD
AT1G05860	at1:1769014	AT2G31600	at2:13448190	WGD
AT1G05870	at1:1771457	AT2G31560	at2:13436557	WGD
AT1G05880	at1:1775643	AT2G31510	at2:13416646	WGD
AT1G05894	at1:1784803	AT2G31480	at2:13408978	WGD
AT1G05900	at1:1786856	AT2G31450	at2:13401132	WGD
AT1G05920	at1:1796778	AT2G31420	at2:13393364	WGD
AT1G06020	at1:1824548	AT2G31390	at2:13383423	WGD
AT1G06040	at1:1828413	AT2G31380	at2:13381910	WGD
AT1G06070	at1:1834829	AT2G31370	at2:13378961	WGD
AT1G06080	at1:1843568	AT2G31360	at2:13371658	WGD
AT1G06130	at1:1857767	AT2G31350	at2:13368292	WGD
AT1G06135	at1:1862197	AT2G31335	at2:13360883	WGD
AT1G06150	at1:1867015	AT2G31280	at2:13339087	WGD
AT1G06160	at1:1883004	AT2G31230	at2:13306593	WGD
AT1G06170	at1:1884991	AT2G31210	at2:13296143	WGD
AT1G06180	at1:1889408	AT2G31180	at2:13286721	WGD
AT1G06190	at1:1892273	AT2G31150	at2:13272375	WGD
AT1G06200	at1:1894336	AT2G31140	at2:13269926	WGD
AT1G06225	at1:1905975	AT2G31081	at2:13238047	WGD
AT1G06390	at1:1946802	AT2G30980	at2:13182069	WGD
AT1G06430	at1:1960058	AT2G30950	at2:13174321	WGD
AT1G06515	at1:1990636	AT2G30942	at2:13170871	WGD
AT1G06540	at1:2002877	AT2G30930	at2:13162369	WGD
AT1G06620	at1:2025601	AT2G30830	at2:13132707	WGD
AT1G06660	at1:2037311	AT2G30820	at2:13129583	WGD
AT1G06670	at1:2040433	AT2G30800	at2:13120353	WGD
AT1G06680	at1:2047886	AT2G30790	at2:13118937	WGD
AT1G06700	at1:2052481	AT2G30730	at2:13093145	WGD
AT1G06750	at1:2073701	AT2G30630	at2:13046672	WGD
AT1G06760	at1:2076504	AT2G30620	at2:13044931	WGD
AT1G06770	at1:2078911	AT2G30580	at2:13026000	WGD
AT1G06780	at1:2083311	AT2G30575	at2:13020397	WGD
AT1G06800	at1:2089417	AT2G30550	at2:13014848	WGD
AT1G06830	at1:2097151	AT2G30540	at2:13011105	WGD
AT1G06890	at1:2111567	AT2G30460	at2:12976146	WGD
AT1G06920	at1:2124854	AT2G30400	at2:12956561	WGD
AT1G06923	at1:2126749	AT2G30395	at2:12954174	WGD
AT1G06960	at1:2135851	AT2G30260	at2:12905402	WGD
AT1G06970	at1:2138109	AT2G30240	at2:12899907	WGD
AT1G06980	at1:2143031	AT2G30230	at2:12897071	WGD
AT1G06990	at1:2148387	AT2G30220	at2:12891266	WGD
AT1G07025	at1:2157658	AT2G30160	at2:12877838	WGD
AT1G07140	at1:2191723	AT2G30060	at2:12826915	WGD
AT1G07150	at1:2193941	AT2G30040	at2:12821710	WGD
AT1G07160	at1:2197908	AT2G30020	at2:12814410	WGD
AT1G07170	at1:2200123	AT2G30000	at2:12803853	WGD
AT1G07175	at1:2202330	AT2G29995	at2:12796907	WGD
AT1G07180	at1:2204320	AT2G29990	at2:12793340	WGD
AT1G07200	at1:2208730	AT2G29970	at2:12776386	WGD
AT1G07240	at1:2223691	AT2G29710	at2:12698673	WGD
AT1G07270	at1:2229757	AT2G29680	at2:12689549	WGD
AT1G07280	at1:2238110	AT2G29670	at2:12681958	WGD
AT1G07300	at1:2245758	AT2G29640	at2:12671206	WGD
AT1G07330	at1:2251131	AT2G29620	at2:12662741	WGD
AT1G07330	at1:2251131	AT5G58880	at5:23775966	WGD
AT1G07360	at1:2260389	AT2G29580	at2:12651923	WGD
AT1G07370	at1:2263140	AT2G29570	at2:12649906	WGD
AT1G07380	at1:2264829	AT5G58980	at5:23811449	WGD
AT1G07400	at1:2274943	AT2G29500	at2:12633091	WGD
AT1G07410	at1:2276053	AT5G59150	at5:23876586	WGD
AT1G07420	at1:2277807	AT2G29390	at2:12610543	WGD
AT1G07430	at1:2280835	AT2G29380	at2:12608702	WGD
AT1G07430	at1:2280835	AT5G59220	at5:23894404	WGD
AT1G07450	at1:2287926	AT2G29310	at2:12590059	WGD
AT1G07460	at1:2290201	AT2G29220	at2:12562781	WGD
AT1G07470	at1:2291457	AT5G59230	at5:23901555	WGD
AT1G07490	at1:2301380	AT2G29125	at2:12523342	WGD
AT1G07510	at1:2305378	AT2G29080	at2:12489627	WGD
AT1G07520	at1:2309564	AT2G29060	at2:12481744	WGD
AT1G07540	at1:2318433	AT5G59430	at5:23967611	WGD
AT1G07560	at1:2327320	AT2G28960	at2:12437914	WGD
AT1G07570	at1:2331170	AT2G28930	at2:12424342	WGD
AT1G07570	at1:2331170	AT5G02290	at5:470182	WGD
AT1G07620	at1:2344390	AT5G02390	at5:508630	WGD
AT1G07630	at1:2349097	AT2G28890	at2:12405596	WGD
AT1G07630	at1:2349097	AT5G02400	at5:513561	WGD
AT1G07640	at1:2354354	AT2G28810	at2:12363630	WGD
AT1G07640	at1:2354354	AT5G02460	at5:539249	WGD
AT1G07660	at1:2368837	AT2G28740	at2:12329488	WGD
AT1G07660	at1:2368837	AT5G59690	at5:24051552	WGD
AT1G07705	at1:2381615	AT5G59710	at5:24057407	WGD
AT1G07710	at1:2386275	AT5G02620	at5:589527	WGD
AT1G07720	at1:2390655	AT2G28630	at2:12275319	WGD
AT1G07725	at1:2394801	AT2G28640	at2:12284625	WGD
AT1G07725	at1:2394801	AT5G59730	at5:24063947	WGD
AT1G07730	at1:2397527	AT2G28670	at2:12300259	WGD
AT1G07750	at1:2404037	AT2G28680	at2:12302963	WGD
AT1G07770	at1:2408203	AT5G59850	at5:24112200	WGD
AT1G07790	at1:2412980	AT2G28720	at2:12326978	WGD
AT1G07790	at1:2412980	AT5G59910	at5:24127128	WGD
AT1G07795	at1:2414286	AT2G28725	at2:12328605	WGD
AT1G07820	at1:2421216	AT2G28740	at2:12329488	WGD
AT1G07820	at1:2421216	AT5G59970	at5:24146175	WGD
AT1G07870	at1:2429699	AT2G28590	at2:12249679	WGD
AT1G07870	at1:2429699	AT5G02800	at5:635228	WGD
AT1G07870	at1:2429699	AT5G60080	at5:24193181	WGD
AT1G07900	at1:2442622	AT2G28500	at2:12186569	WGD
AT1G07990	at1:2477157	AT2G28360	at2:12124415	WGD
AT1G08000	at1:2483240	AT2G28340	at2:12103672	WGD
AT1G08035	at1:2494402	AT2G28330	at2:12099890	WGD
AT1G08040	at1:2495342	AT2G28310	at2:12085507	WGD
AT1G08060	at1:2501742	AT2G28240	at2:12039212	WGD
AT1G08065	at1:2511647	AT2G28210	at2:12029997	WGD
AT1G08135	at1:2548819	AT2G28170	at2:12006371	WGD
AT1G08730	at1:2779963	AT1G54560	at1:20371649	WGD
AT1G08880	at1:2846949	AT1G54690	at1:20414316	WGD
AT1G08930	at1:2873465	AT1G54730	at1:20424422	WGD
AT1G08970	at1:2882524	AT1G54830	at1:20451083	WGD
AT1G08970	at1:2882524	AT1G56170	at1:21024793	WGD
AT1G08990	at1:2888753	AT1G54940	at1:20481690	WGD
AT1G09000	at1:2891037	AT1G54960	at1:20499950	WGD
AT1G09040	at1:2911317	AT1G55050	at1:20541887	WGD
AT1G09155	at1:2949676	AT1G56240	at1:21056232	WGD
AT1G09180	at1:2965023	AT1G56330	at1:21086555	WGD
AT1G09210	at1:2972842	AT1G56340	at1:21089880	WGD
AT1G09240	at1:2984881	AT1G56430	at1:21136944	WGD
AT1G09310	at1:3009055	AT1G56580	at1:21198259	WGD
AT1G09350	at1:3019819	AT1G56600	at1:21207537	WGD
AT1G09390	at1:3031203	AT1G56670	at1:21241673	WGD
AT1G09410	at1:3035443	AT1G56690	at1:21253817	WGD
AT1G09440	at1:3045513	AT1G56720	at1:21263420	WGD
AT1G09540	at1:3086159	AT1G57560	at1:21316828	WGD
AT1G09550	at1:3089733	AT1G57590	at1:21327360	WGD
AT1G09575	at1:3101671	AT1G57610	at1:21337235	WGD
AT1G09580	at1:3104588	AT1G57620	at1:21342721	WGD
AT1G09590	at1:3106502	AT1G57660	at1:21355520	WGD
AT1G09600	at1:3108617	AT1G57700	at1:21370683	WGD
AT1G09640	at1:3119878	AT1G57720	at1:21377615	WGD
AT1G09645	at1:3122956	AT1G57765	at1:21393351	WGD
AT1G09665	at1:3133095	AT1G57830	at1:21420309	WGD
AT1G09690	at1:3136188	AT1G57860	at1:21429898	WGD
AT1G09795	at1:3173534	AT1G58080	at1:21504314	WGD
AT1G09932	at1:3230450	AT1G58280	at1:21620331	WGD
AT1G09940	at1:3236995	AT1G58290	at1:21623726	WGD
AT1G09950	at1:3240606	AT1G58330	at1:21641130	WGD
AT1G09980	at1:3256245	AT1G58350	at1:21662916	WGD
AT1G10010	at1:3265976	AT1G58360	at1:21676530	WGD
AT1G10050	at1:3279270	AT1G58370	at1:21684584	WGD
AT1G10090	at1:3290311	AT1G58520	at1:21729913	WGD
AT1G10150	at1:3325824	AT1G59510	at1:21859595	WGD
AT1G10210	at1:3349235	AT1G59580	at1:21884043	WGD
AT1G10220	at1:3354243	AT1G59590	at1:21887752	WGD
AT1G10290	at1:3370558	AT1G59610	at1:21893221	WGD
AT1G10350	at1:3393407	AT1G59725	at1:21950738	WGD
AT1G10430	at1:3428478	AT1G59830	at1:22020552	WGD
AT1G10450	at1:3431780	AT1G59890	at1:22043829	WGD
AT1G10470	at1:3442327	AT1G59940	at1:22065617	WGD
AT1G10530	at1:3471456	AT1G60010	at1:22095360	WGD
AT1G10540	at1:3474864	AT1G60030	at1:22113841	WGD
AT1G10560	at1:3484580	AT1G60190	at1:22198403	WGD
AT1G10570	at1:3487594	AT1G60220	at1:22208332	WGD
AT1G10640	at1:3515365	AT1G60590	at1:22314170	WGD
AT1G10650	at1:3524018	AT1G60610	at1:22327999	WGD
AT1G10670	at1:3535387	AT1G60810	at1:22388527	WGD
AT1G10690	at1:3549992	AT1G60783	at1:22374909	WGD
AT1G10730	at1:3565463	AT1G60780	at1:22368953	WGD
AT1G10770	at1:3591633	AT1G60760	at1:22365832	WGD
AT1G10810	at1:3599271	AT1G60680	at1:22347622	WGD
AT1G10820	at1:3600910	AT1G60670	at1:22343655	WGD
AT1G10850	at1:3611747	AT1G60630	at1:22334662	WGD
AT1G10870	at1:3616610	AT1G60860	at1:22400927	WGD
AT1G10900	at1:3632234	AT1G60890	at1:22412246	WGD
AT1G10930	at1:3647894	AT1G60930	at1:22430847	WGD
AT1G10940	at1:3655777	AT1G60940	at1:22439123	WGD
AT1G10960	at1:3664386	AT1G60950	at1:22444390	WGD
AT1G10970	at1:3665087	AT1G60960	at1:22445310	WGD
AT1G11060	at1:3684568	AT1G61030	at1:22477896	WGD
AT1G11070	at1:3690212	AT1G61080	at1:22493194	WGD
AT1G11080	at1:3694707	AT1G61130	at1:22529024	WGD
AT1G11100	at1:3703691	AT1G61140	at1:22536215	WGD
AT1G11110	at1:3710208	AT1G61150	at1:22542525	WGD
AT1G11125	at1:3718783	AT1G61170	at1:22549638	WGD
AT1G11160	at1:3733139	AT1G61210	at1:22564495	WGD
AT1G11170	at1:3741129	AT1G61240	at1:22582024	WGD
AT1G11180	at1:3745783	AT1G61250	at1:22585838	WGD
AT1G11190	at1:3750066	AT4G21585	at4:11477988	WGD
AT1G11200	at1:3753365	AT4G21570	at4:11470883	WGD
AT1G11210	at1:3755677	AT1G61260	at1:22593465	WGD
AT1G11250	at1:3768724	AT1G61290	at1:22605009	WGD
AT1G11260	at1:3777328	AT4G21480	at4:11433303	WGD
AT1G11280	at1:3787334	AT1G61480	at1:22681316	WGD
AT1G11310	at1:3800738	AT1G61560	at1:22708697	WGD
AT1G11330	at1:3810093	AT4G21390	at4:11394355	WGD
AT1G11360	at1:3821443	AT4G27320	at4:13678464	WGD
AT1G11390	at1:3834459	AT1G61640	at1:22746372	WGD
AT1G11410	at1:3841286	AT4G21380	at4:11388925	WGD
AT1G11410	at1:3841286	AT4G27290	at4:13666281	WGD
AT1G11475	at1:3862399	AT1G61700	at1:22787012	WGD
AT1G11490	at1:3868884	AT4G27240	at4:13639963	WGD
AT1G11500	at1:3870833	AT4G21310	at4:11339048	WGD
AT1G11510	at1:3871778	AT1G61730	at1:22793219	WGD
AT1G11540	at1:3875442	AT1G61740	at1:22798069	WGD
AT1G11540	at1:3875442	AT4G21250	at4:11325002	WGD
AT1G11560	at1:3881788	AT1G61790	at1:22814390	WGD
AT1G11630	at1:3912902	AT1G61870	at1:22865004	WGD
AT1G11650	at1:3914774	AT4G27000	at4:13554604	WGD
AT1G11655	at1:3919272	AT4G21902	at4:11619786	WGD
AT1G11670	at1:3928162	AT1G61890	at1:22867770	WGD
AT1G11670	at1:3928162	AT4G21903	at4:11620998	WGD
AT1G11700	at1:3945737	AT1G61930	at1:22893101	WGD
AT1G11700	at1:3945737	AT4G21930	at4:11639757	WGD
AT1G11730	at1:3957473	AT4G26940	at4:13529425	WGD
AT1G11740	at1:3963054	AT1G62045	at1:22934688	WGD
AT1G11910	at1:4016784	AT1G62290	at1:23009911	WGD
AT1G11910	at1:4016784	AT4G22050	at4:11683865	WGD
AT1G11920	at1:4023667	AT4G22080	at4:11700555	WGD
AT1G11925	at1:4025930	AT4G26880	at4:13508265	WGD
AT1G11930	at1:4028692	AT4G26860	at4:13503086	WGD
AT1G11940	at1:4031574	AT1G62305	at1:23026776	WGD
AT1G11950	at1:4034587	AT1G62310	at1:23036039	WGD
AT1G11960	at1:4039711	AT1G62320	at1:23041668	WGD
AT1G11960	at1:4039711	AT4G22120	at4:11715824	WGD
AT1G11990	at1:4046246	AT1G62330	at1:23046893	WGD
AT1G12010	at1:4056207	AT1G62380	at1:23082170	WGD
AT1G12020	at1:4062462	AT1G62422	at1:23100139	WGD
AT1G12030	at1:4064667	AT1G62420	at1:23102793	WGD
AT1G12040	at1:4070124	AT1G62440	at1:23111818	WGD
AT1G12070	at1:4078913	AT1G62450	at1:23115958	WGD
AT1G12090	at1:4089847	AT1G62510	at1:23136369	WGD
AT1G12120	at1:4114771	AT1G62530	at1:23146332	WGD
AT1G12130	at1:4118594	AT1G62540	at1:23151794	WGD
AT1G12160	at1:4126066	AT1G62560	at1:23159823	WGD
AT1G12200	at1:4137533	AT1G62570	at1:23169136	WGD
AT1G12220	at1:4144572	AT1G62630	at1:23185912	WGD
AT1G12240	at1:4153652	AT1G62660	at1:23199718	WGD
AT1G12260	at1:4162832	AT1G62700	at1:23216218	WGD
AT1G12270	at1:4172075	AT1G62740	at1:23230956	WGD
AT1G12310	at1:4187165	AT1G62820	at1:23263671	WGD
AT1G12320	at1:4189355	AT1G62840	at1:23271416	WGD
AT1G12380	at1:4214262	AT1G62870	at1:23284012	WGD
AT1G12400	at1:4221863	AT1G62886	at1:23294413	WGD
AT1G12460	at1:4247249	AT1G62950	at1:23315294	WGD
AT1G12540	at1:4272960	AT1G62975	at1:23328850	WGD
AT1G12560	at1:4276519	AT1G62980	at1:23331676	WGD
AT1G12610	at1:4289944	AT1G63030	at1:23367512	WGD
AT1G12640	at1:4303312	AT1G63050	at1:23375884	WGD
AT1G12710	at1:4326739	AT1G63090	at1:23391063	WGD
AT1G12730	at1:4334615	AT1G63110	at1:23404835	WGD
AT1G12750	at1:4344985	AT1G63120	at1:23408876	WGD
AT1G12760	at1:4348498	AT1G63170	at1:23425352	WGD
AT1G12780	at1:4355926	AT1G63180	at1:23427409	WGD
AT1G12820	at1:4368760	AT3G26810	at3:9867845	WGD
AT1G12850	at1:4379707	AT3G26780	at3:9848628	WGD
AT1G12860	at1:4384353	AT3G26744	at3:9832713	WGD
AT1G12880	at1:4389751	AT3G26690	at3:9804253	WGD
AT1G12900	at1:4392450	AT3G26650	at3:9795071	WGD
AT1G12910	at1:4394897	AT3G26640	at3:9793220	WGD
AT1G12920	at1:4396348	AT3G26618	at3:9788605	WGD
AT1G12950	at1:4419770	AT3G26590	at3:9761700	WGD
AT1G12970	at1:4423640	AT3G26500	at3:9708109	WGD
AT1G12990	at1:4433640	AT3G26445	at3:9680120	WGD
AT1G13000	at1:4436105	AT3G26440	at3:9676564	WGD
AT1G13020	at1:4440544	AT3G26400	at3:9666616	WGD
AT1G13050	at1:4450238	AT3G26350	at3:9653660	WGD
AT1G13060	at1:4452271	AT3G26340	at3:9650417	WGD
AT1G13090	at1:4461806	AT3G26210	at3:9593132	WGD
AT1G13100	at1:4463924	AT3G26170	at3:9573360	WGD
AT1G13130	at1:4474720	AT3G26130	at3:9553708	WGD
AT1G13140	at1:4478491	AT3G26125	at3:9551812	WGD
AT1G13210	at1:4508963	AT3G25610	at3:9308942	WGD
AT1G13230	at1:4520631	AT3G25670	at3:9344532	WGD
AT1G13245	at1:4525486	AT3G25717	at3:9375102	WGD
AT1G13260	at1:4542168	AT3G25730	at3:9396420	WGD
AT1G13270	at1:4544956	AT3G25740	at3:9397786	WGD
AT1G13280	at1:4547454	AT3G25760	at3:9403883	WGD
AT1G13300	at1:4556892	AT3G25790	at3:9413127	WGD
AT1G13320	at1:4563475	AT3G25800	at3:9422588	WGD
AT1G13350	at1:4572419	AT3G25840	at3:9452663	WGD
AT1G13360	at1:4576967	AT3G25870	at3:9463316	WGD
AT1G13450	at1:4612731	AT3G25990	at3:9504677	WGD
AT1G13460	at1:4615813	AT3G26020	at3:9513696	WGD
AT1G13580	at1:4644700	AT1G26200	at1:9063471	WGD
AT1G13600	at1:4650787	AT2G04038	at2:1331919	WGD
AT1G13600	at1:4650787	AT5G60830	at5:24472639	WGD
AT1G13620	at1:4668443	AT2G04025	at2:1276777	WGD
AT1G13640	at1:4677027	AT1G26270	at1:9089524	WGD
AT1G13640	at1:4677027	AT2G03890	at2:1185525	WGD
AT1G13650	at1:4680432	AT2G03810	at2:1161526	WGD
AT1G13730	at1:4709824	AT1G69250	at1:26032827	WGD
AT1G13730	at1:4709824	AT2G03640	at2:1104307	WGD
AT1G13730	at1:4709824	AT5G60980	at5:24543443	WGD
AT1G13740	at1:4713674	AT1G69260	at1:26039048	WGD
AT1G13830	at1:4739873	AT1G26450	at1:9148710	WGD
AT1G13830	at1:4739873	AT1G69295	at1:26050197	WGD
AT1G13830	at1:4739873	AT2G03505	at2:1064236	WGD
AT1G13830	at1:4739873	AT5G61130	at5:24587213	WGD
AT1G13860	at1:4743308	AT2G03480	at2:1050842	WGD
AT1G13880	at1:4748873	AT1G26580	at1:9184606	WGD
AT1G13880	at1:4748873	AT2G03470	at2:1045456	WGD
AT1G13890	at1:4751581	AT5G61210	at5:24623299	WGD
AT1G13900	at1:4753145	AT2G03450	at2:1041388	WGD
AT1G13910	at1:4755784	AT5G61240	at5:24629280	WGD
AT1G13920	at1:4758188	AT1G69325	at1:26063205	WGD
AT1G13920	at1:4758188	AT5G61280	at5:24643625	WGD
AT1G13930	at1:4761012	AT2G03440	at2:1039205	WGD
AT1G13940	at1:4762703	AT1G26620	at1:9195838	WGD
AT1G13940	at1:4762703	AT1G69360	at1:26072284	WGD
AT1G13950	at1:4773576	AT1G26630	at1:9205836	WGD
AT1G13950	at1:4773576	AT1G69410	at1:26089202	WGD
AT1G13960	at1:4776463	AT2G03340	at2:1014350	WGD
AT1G14010	at1:4800169	AT1G26690	at1:9224145	WGD
AT1G14010	at1:4800169	AT1G69460	at1:26111809	WGD
AT1G14010	at1:4800169	AT2G03290	at2:999422	WGD
AT1G14020	at1:4802720	AT2G03280	at2:996088	WGD
AT1G14040	at1:4810488	AT1G26730	at1:9241435	WGD
AT1G14040	at1:4810488	AT1G69480	at1:26114112	WGD
AT1G14040	at1:4810488	AT2G03240	at2:973413	WGD
AT1G14070	at1:4818548	AT2G03210	at2:968335	WGD
AT1G14170	at1:4843234	AT2G03110	at2:935336	WGD
AT1G14200	at1:4854384	AT1G26800	at1:9285099	WGD
AT1G14200	at1:4854384	AT2G03000	at2:875233	WGD
AT1G14210	at1:4856778	AT1G26820	at1:9292446	WGD
AT1G14210	at1:4856778	AT2G02990	at2:873506	WGD
AT1G14230	at1:4861266	AT2G02970	at2:865070	WGD
AT1G14260	at1:4872856	AT2G02960	at2:862087	WGD
AT1G14280	at1:4877627	AT2G02950	at2:854947	WGD
AT1G14320	at1:4888214	AT1G26910	at1:9321650	WGD
AT1G14330	at1:4890118	AT1G26930	at1:9336057	WGD
AT1G14330	at1:4890118	AT2G02870	at2:837840	WGD
AT1G14350	at1:4908255	AT2G02820	at2:804890	WGD
AT1G14360	at1:4911093	AT2G02810	at2:801530	WGD
AT1G14370	at1:4915576	AT1G26970	at1:9359682	WGD
AT1G14370	at1:4915576	AT2G02800	at2:795515	WGD
AT1G14380	at1:4918010	AT2G02790	at2:787915	WGD
AT1G14390	at1:4924277	AT2G02780	at2:781847	WGD
AT1G14400	at1:4927011	AT2G02760	at2:773684	WGD
AT1G14410	at1:4929123	AT2G02740	at2:769344	WGD
AT1G14420	at1:4931566	AT2G02720	at2:763011	WGD
AT1G14440	at1:4938824	AT2G02540	at2:683647	WGD
AT1G14450	at1:4946218	AT2G02510	at2:673305	WGD
AT1G14460	at1:4948748	AT2G02480	at2:660743	WGD
AT1G14510	at1:4961886	AT2G02470	at2:652580	WGD
AT1G14530	at1:4971157	AT2G02180	at2:560864	WGD
AT1G14580	at1:4989562	AT2G02070	at2:505487	WGD
AT1G14590	at1:4998816	AT2G02061	at2:498025	WGD
AT1G14600	at1:5001011	AT2G02060	at2:495570	WGD
AT1G14610	at1:5008244	AT1G27160	at1:9432418	WGD
AT1G14630	at1:5019955	AT2G01990	at2:465001	WGD
AT1G14660	at1:5031972	AT2G01980	at2:457010	WGD
AT1G14670	at1:5037612	AT2G01970	at2:451871	WGD
AT1G14685	at1:5042588	AT2G01930	at2:427121	WGD
AT1G14686	at1:5045781	AT2G01920	at2:426052	WGD
AT1G14690	at1:5051760	AT2G01910	at2:417427	WGD
AT1G14700	at1:5058680	AT2G01880	at2:391423	WGD
AT1G14720	at1:5066636	AT2G01850	at2:385199	WGD
AT1G14840	at1:5111955	AT2G01750	at2:328089	WGD
AT1G14860	at1:5124742	AT2G01670	at2:296510	WGD
AT1G14890	at1:5137014	AT2G01610	at2:273917	WGD
AT1G14910	at1:5139712	AT2G01600	at2:268818	WGD
AT1G14920	at1:5149226	AT2G01570	at2:255249	WGD
AT1G14930	at1:5152263	AT2G01520	at2:235925	WGD
AT1G14970	at1:5161949	AT2G01480	at2:216722	WGD
AT1G15010	at1:5171207	AT2G01300	at2:151057	WGD
AT1G15020	at1:5173097	AT2G01270	at2:139331	WGD
AT1G15030	at1:5177529	AT2G01260	at2:135244	WGD
AT1G15050	at1:5182256	AT2G01200	at2:118018	WGD
AT1G15080	at1:5187626	AT2G01180	at2:106900	WGD
AT1G15100	at1:5193426	AT2G01150	at2:100649	WGD
AT1G15120	at1:5202648	AT2G01090	at2:79989	WGD
AT1G15280	at1:5252315	AT1G80000	at1:30092924	WGD
AT1G15330	at1:5274346	AT1G80090	at1:30130104	WGD
AT1G15380	at1:5290747	AT1G80160	at1:30151003	WGD
AT1G15400	at1:5296225	AT1G80180	at1:30156826	WGD
AT1G15430	at1:5304317	AT1G80220	at1:30167839	WGD
AT1G15480	at1:5318011	AT1G80270	at1:30180982	WGD
AT1G15490	at1:5320615	AT1G80280	at1:30183541	WGD
AT1G15500	at1:5326290	AT1G80300	at1:30191856	WGD
AT1G15540	at1:5342587	AT1G80320	at1:30196782	WGD
AT1G15550	at1:5344478	AT1G80330	at1:30198061	WGD
AT1G15570	at1:5362009	AT1G80370	at1:30213705	WGD
AT1G15590	at1:5367374	AT1G80400	at1:30225176	WGD
AT1G15670	at1:5389952	AT1G80440	at1:30241607	WGD
AT1G15730	at1:5407401	AT1G80480	at1:30258076	WGD
AT1G15750	at1:5414817	AT1G80490	at1:30260931	WGD
AT1G15760	at1:5425714	AT1G80520	at1:30276481	WGD
AT1G15800	at1:5441082	AT1G80610	at1:30300733	WGD
AT1G15810	at1:5444418	AT1G80620	at1:30305362	WGD
AT1G15850	at1:5453245	AT1G80670	at1:30320576	WGD
AT1G15870	at1:5457084	AT1G80720	at1:30336138	WGD
AT1G15920	at1:5469558	AT1G80780	at1:30358115	WGD
AT1G15940	at1:5473565	AT1G80810	at1:30365287	WGD
AT1G15950	at1:5478754	AT1G80820	at1:30370572	WGD
AT1G15960	at1:5481665	AT1G80830	at1:30372879	WGD
AT1G15970	at1:5486319	AT1G80850	at1:30385449	WGD
AT1G16000	at1:5494533	AT1G80890	at1:30397128	WGD
AT1G16010	at1:5495373	AT1G80900	at1:30398150	WGD
AT1G16020	at1:5498165	AT1G80910	at1:30400734	WGD
AT1G16030	at1:5502206	AT1G79920	at1:30058632	WGD
AT1G16060	at1:5508543	AT1G79700	at1:29990336	WGD
AT1G16090	at1:5516259	AT1G79670	at1:29976887	WGD
AT1G16170	at1:5538732	AT1G79660	at1:29975863	WGD
AT1G16190	at1:5543152	AT1G79650	at1:29972108	WGD
AT1G16220	at1:5548653	AT1G79630	at1:29962645	WGD
AT1G16225	at1:5551041	AT1G79590	at1:29946237	WGD
AT1G16270	at1:5563087	AT1G79570	at1:29932578	WGD
AT1G16300	at1:5574310	AT1G79530	at1:29915902	WGD
AT1G16310	at1:5578431	AT1G79520	at1:29912251	WGD
AT1G16320	at1:5580855	AT1G79510	at1:29908013	WGD
AT1G16340	at1:5587790	AT1G79500	at1:29903515	WGD
AT1G16350	at1:5590951	AT1G79470	at1:29894598	WGD
AT1G16360	at1:5593301	AT1G79450	at1:29887689	WGD
AT1G16380	at1:5598453	AT1G79400	at1:29864992	WGD
AT1G16400	at1:5605159	AT1G79370	at1:29857934	WGD
AT1G16420	at1:5612150	AT1G79310	at1:29833921	WGD
AT1G16440	at1:5615815	AT1G79250	at1:29810134	WGD
AT1G16460	at1:5619641	AT1G79230	at1:29800693	WGD
AT1G16470	at1:5622838	AT1G79210	at1:29796081	WGD
AT1G16490	at1:5629655	AT1G79180	at1:29786495	WGD
AT1G16500	at1:5639032	AT1G79160	at1:29779721	WGD
AT1G16510	at1:5644572	AT1G79130	at1:29771278	WGD
AT1G16610	at1:5675704	AT1G79100	at1:29753648	WGD
AT1G16680	at1:5702753	AT1G79030	at1:29730767	WGD
AT1G16690	at1:5705969	AT1G79020	at1:29727123	WGD
AT1G16700	at1:5709725	AT1G79010	at1:29724879	WGD
AT1G16705	at1:5712088	AT1G79000	at1:29716350	WGD
AT1G16760	at1:5734234	AT1G78940	at1:29680822	WGD
AT1G16780	at1:5739299	AT1G78920	at1:29671495	WGD
AT1G16820	at1:5756835	AT1G78900	at1:29660184	WGD
AT1G16825	at1:5758855	AT1G78895	at1:29658116	WGD
AT1G16840	at1:5762713	AT1G78890	at1:29656577	WGD
AT1G16860	at1:5767300	AT1G78880	at1:29652633	WGD
AT1G16890	at1:5776346	AT1G78870	at1:29650455	WGD
AT1G16905	at1:5782455	AT1G78820	at1:29634124	WGD
AT1G16910	at1:5785003	AT1G78815	at1:29631743	WGD
AT1G16930	at1:5789987	AT1G78750	at1:29613122	WGD
AT1G16980	at1:5807311	AT1G78580	at1:29552340	WGD
AT1G17010	at1:5817567	AT1G78550	at1:29544927	WGD
AT1G17040	at1:5824848	AT1G78540	at1:29541094	WGD
AT1G17050	at1:5829080	AT1G78510	at1:29535285	WGD
AT1G17060	at1:5832097	AT3G14620	at3:4914914	WGD
AT1G17080	at1:5840269	AT3G14595	at3:4908948	WGD
AT1G17100	at1:5844676	AT1G78450	at1:29516989	WGD
AT1G17110	at1:5845675	AT3G14400	at3:4811532	WGD
AT1G17140	at1:5856573	AT1G78430	at1:29508959	WGD
AT1G17145	at1:5860119	AT1G78420	at1:29504533	WGD
AT1G17147	at1:5863431	AT1G78410	at1:29502582	WGD
AT1G17150	at1:5865707	AT1G78400	at1:29498281	WGD
AT1G17190	at1:5875350	AT1G78340	at1:29472892	WGD
AT1G17200	at1:5878412	AT3G14380	at3:4802952	WGD
AT1G17240	at1:5896416	AT1G72300	at1:27217477	WGD
AT1G17290	at1:5922630	AT1G72330	at1:27233485	WGD
AT1G17310	at1:5928014	AT1G72350	at1:27239273	WGD
AT1G17340	at1:5933870	AT3G14205	at3:4715707	WGD
AT1G17350	at1:5941784	AT1G72420	at1:27261194	WGD
AT1G17360	at1:5946764	AT3G14172	at3:4698796	WGD
AT1G17370	at1:5951542	AT3G14100	at3:4672919	WGD
AT1G17380	at1:5955488	AT1G72450	at1:27274065	WGD
AT1G17400	at1:5960481	AT1G72490	at1:27288900	WGD
AT1G17420	at1:5977411	AT1G72520	at1:27308515	WGD
AT1G17430	at1:5982267	AT1G72620	at1:27341079	WGD
AT1G17430	at1:5982267	AT1G78210	at1:29422716	WGD
AT1G17455	at1:5997180	AT1G72630	at1:27344270	WGD
AT1G17460	at1:5998814	AT1G72650	at1:27349467	WGD
AT1G17470	at1:6002959	AT1G72660	at1:27353880	WGD
AT1G17480	at1:6006461	AT1G72670	at1:27356683	WGD
AT1G17490	at1:6008589	AT1G72690	at1:27361154	WGD
AT1G17500	at1:6018757	AT1G72700	at1:27365896	WGD
AT1G17500	at1:6018757	AT3G13900	at3:4586151	WGD
AT1G17520	at1:6024636	AT1G72740	at1:27380294	WGD
AT1G17530	at1:6027631	AT1G72750	at1:27383365	WGD
AT1G17540	at1:6029277	AT1G72760	at1:27385421	WGD
AT1G17545	at1:6033109	AT1G72770	at1:27390022	WGD
AT1G17590	at1:6050193	AT1G72830	at1:27405456	WGD
AT1G17600	at1:6052936	AT1G72840	at1:27409237	WGD
AT1G17610	at1:6056895	AT1G72850	at1:27413971	WGD
AT1G17615	at1:6059441	AT1G72890	at1:27429916	WGD
AT1G17710	at1:6090560	AT1G73010	at1:27464572	WGD
AT1G17730	at1:6099089	AT1G73030	at1:27473826	WGD
AT1G17750	at1:6106656	AT1G73066	at1:27481785	WGD
AT1G17770	at1:6120741	AT1G73100	at1:27491184	WGD
AT1G17780	at1:6123701	AT1G73130	at1:27499035	WGD
AT1G17790	at1:6125356	AT1G73150	at1:27504112	WGD
AT1G17810	at1:6130025	AT1G73190	at1:27521944	WGD
AT1G17820	at1:6131537	AT1G73200	at1:27523454	WGD
AT1G17830	at1:6135803	AT1G73210	at1:27528052	WGD
AT1G17880	at1:6152409	AT1G73230	at1:27540228	WGD
AT1G17890	at1:6154268	AT1G73250	at1:27545006	WGD
AT1G17920	at1:6161872	AT1G73360	at1:27578696	WGD
AT1G17940	at1:6169341	AT1G73390	at1:27590810	WGD
AT1G17950	at1:6177617	AT1G73410	at1:27601632	WGD
AT1G17970	at1:6184904	AT1G73760	at1:27739168	WGD
AT1G18040	at1:6206871	AT1G73690	at1:27714948	WGD
AT1G18150	at1:6244384	AT1G73670	at1:27700050	WGD
AT1G18160	at1:6248793	AT1G73660	at1:27691893	WGD
AT1G18170	at1:6254229	AT1G73655	at1:27690359	WGD
AT1G18180	at1:6255830	AT1G73650	at1:27688243	WGD
AT1G18200	at1:6265416	AT1G73640	at1:27686992	WGD
AT1G18210	at1:6267969	AT1G73630	at1:27684736	WGD
AT1G18250	at1:6276788	AT1G73620	at1:27681408	WGD
AT1G18260	at1:6278848	AT1G73570	at1:27650992	WGD
AT1G18280	at1:6294333	AT1G73550	at1:27648024	WGD
AT1G18300	at1:6299687	AT1G73540	at1:27645658	WGD
AT1G18350	at1:6315651	AT1G73500	at1:27639091	WGD
AT1G18360	at1:6316695	AT1G73480	at1:27628939	WGD
AT1G18400	at1:6331398	AT1G73830	at1:27759975	WGD
AT1G18410	at1:6336528	AT1G73860	at1:27770986	WGD
AT1G18450	at1:6348107	AT1G73910	at1:27789293	WGD
AT1G18460	at1:6352470	AT1G73920	at1:27790875	WGD
AT1G18470	at1:6356131	AT1G73950	at1:27799830	WGD
AT1G18500	at1:6369347	AT1G74040	at1:27842171	WGD
AT1G18510	at1:6373295	AT1G74045	at1:27846111	WGD
AT1G18540	at1:6377321	AT1G74050	at1:27847047	WGD
AT1G18570	at1:6389411	AT1G74080	at1:27855699	WGD
AT1G18580	at1:6395864	AT1G74088	at1:27861116	WGD
AT1G18590	at1:6398580	AT1G74090	at1:27862909	WGD
AT1G18600	at1:6400404	AT1G74130	at1:27873657	WGD
AT1G18610	at1:6405645	AT1G74150	at1:27880528	WGD
AT1G18620	at1:6409978	AT1G74160	at1:27886426	WGD
AT1G18630	at1:6414725	AT1G74230	at1:27914699	WGD
AT1G18670	at1:6426898	AT1G74330	at1:27943618	WGD
AT1G18690	at1:6433574	AT1G74380	at1:27959578	WGD
AT1G18710	at1:6450594	AT1G74430	at1:27975179	WGD
AT1G18720	at1:6457821	AT1G74440	at1:27976502	WGD
AT1G18740	at1:6463922	AT1G74450	at1:27982509	WGD
AT1G18790	at1:6478851	AT1G74480	at1:27993032	WGD
AT1G18800	at1:6481113	AT1G74560	at1:28017584	WGD
AT1G18835	at1:6496098	AT1G74660	at1:28047576	WGD
AT1G18840	at1:6500848	AT1G74690	at1:28061159	WGD
AT1G18870	at1:6515429	AT1G74710	at1:28070296	WGD
AT1G18890	at1:6522764	AT1G74740	at1:28079946	WGD
AT1G18900	at1:6528984	AT1G74750	at1:28086800	WGD
AT1G18910	at1:6532559	AT1G74770	at1:28089571	WGD
AT1G18940	at1:6543852	AT1G74780	at1:28095815	WGD
AT1G18970	at1:6554568	AT1G74820	at1:28111882	WGD
AT1G18990	at1:6558678	AT1G74830	at1:28113423	WGD
AT1G19000	at1:6560792	AT1G74840	at1:28115908	WGD
AT1G19010	at1:6565494	AT1G74860	at1:28123319	WGD
AT1G19050	at1:6577833	AT1G74890	at1:28131590	WGD
AT1G19210	at1:6626822	AT1G74930	at1:28144132	WGD
AT1G19270	at1:6662501	AT4G36860	at4:17358438	WGD
AT1G19310	at1:6676234	AT1G74990	at1:28159715	WGD
AT1G19320	at1:6679281	AT1G75030	at1:28174378	WGD
AT1G19330	at1:6680563	AT1G75060	at1:28181275	WGD
AT1G19350	at1:6688535	AT1G75080	at1:28185504	WGD
AT1G19350	at1:6688535	AT4G36780	at4:17332517	WGD
AT1G19360	at1:6690456	AT1G75110	at1:28194115	WGD
AT1G19370	at1:6692764	AT1G75140	at1:28202053	WGD
AT1G19380	at1:6698058	AT4G36660	at4:17285732	WGD
AT1G19400	at1:6712038	AT1G75180	at1:28215836	WGD
AT1G19450	at1:6731434	AT1G75220	at1:28229157	WGD
AT1G19460	at1:6738484	AT2G21680	at2:9267730	WGD
AT1G19480	at1:6744353	AT1G75230	at1:28234349	WGD
AT1G19510	at1:6756284	AT1G75250	at1:28245073	WGD
AT1G19510	at1:6756284	AT2G21650	at2:9259583	WGD
AT1G19510	at1:6756284	AT4G36570	at4:17254660	WGD
AT1G19510	at1:6756284	AT4G39250	at4:18271457	WGD
AT1G19540	at1:6765667	AT1G75280	at1:28251960	WGD
AT1G19540	at1:6765667	AT4G39230	at4:18265885	WGD
AT1G19640	at1:6788885	AT4G36470	at4:17215027	WGD
AT1G19650	at1:6796202	AT1G75370	at1:28276426	WGD
AT1G19650	at1:6796202	AT2G21520	at2:9215519	WGD
AT1G19650	at1:6796202	AT4G39170	at4:18240605	WGD
AT1G19660	at1:6799981	AT1G75380	at1:28281389	WGD
AT1G19680	at1:6805457	AT1G75400	at1:28296919	WGD
AT1G19680	at1:6805457	AT2G21500	at2:9207669	WGD
AT1G19680	at1:6805457	AT4G39140	at4:18229331	WGD
AT1G19700	at1:6809765	AT1G75410	at1:28299792	WGD
AT1G19710	at1:6814793	AT1G75420	at1:28305297	WGD
AT1G19740	at1:6824322	AT1G75460	at1:28327886	WGD
AT1G19770	at1:6832347	AT1G75470	at1:28330072	WGD
AT1G19790	at1:6838120	AT1G75520	at1:28351562	WGD
AT1G19790	at1:6838120	AT2G21400	at2:9158390	WGD
AT1G19790	at1:6838120	AT4G36260	at4:17155556	WGD
AT1G19830	at1:6852155	AT1G75580	at1:28377461	WGD
AT1G19830	at1:6852155	AT2G21220	at2:9089326	WGD
AT1G19835	at1:6855952	AT4G36120	at4:17093088	WGD
AT1G19840	at1:6872794	AT1G75590	at1:28382896	WGD
AT1G19900	at1:6906899	AT1G75620	at1:28394779	WGD
AT1G19910	at1:6913229	AT1G75630	at1:28400608	WGD
AT1G19910	at1:6913229	AT4G38920	at4:18147211	WGD
AT1G19940	at1:6918191	AT1G75680	at1:28417052	WGD
AT1G19950	at1:6924184	AT1G75700	at1:28423896	WGD
AT1G19970	at1:6931012	AT1G75760	at1:28446632	WGD
AT1G19970	at1:6931012	AT2G21190	at2:9080865	WGD
AT1G19970	at1:6931012	AT4G38790	at4:18111361	WGD
AT1G20010	at1:6937795	AT1G75780	at1:28451141	WGD
AT1G20030	at1:6945695	AT1G75800	at1:28458782	WGD
AT1G20030	at1:6945695	AT4G36000	at4:17037583	WGD
AT1G20030	at1:6945695	AT4G38660	at4:18066177	WGD
AT1G20080	at1:6962132	AT2G20990	at2:9014552	WGD
AT1G20090	at1:6966922	AT1G75840	at1:28475707	WGD
AT1G20090	at1:6966922	AT4G35950	at4:17023837	WGD
AT1G20100	at1:6969107	AT1G75860	at1:28484163	WGD
AT1G20120	at1:6975388	AT1G75880	at1:28490443	WGD
AT1G20135	at1:6984124	AT1G75910	at1:28501434	WGD
AT1G20140	at1:6986358	AT1G75950	at1:28516548	WGD
AT1G20200	at1:7001201	AT1G75990	at1:28524493	WGD
AT1G20220	at1:7004879	AT1G76010	at1:28528077	WGD
AT1G20225	at1:7007756	AT1G76020	at1:28532097	WGD
AT1G20260	at1:7016693	AT1G76030	at1:28533798	WGD
AT1G20260	at1:7016693	AT4G38510	at4:18010812	WGD
AT1G20270	at1:7020749	AT4G35810	at4:16968921	WGD
AT1G20310	at1:7032290	AT1G76070	at1:28546382	WGD
AT1G20330	at1:7038688	AT1G76090	at1:28550409	WGD
AT1G20340	at1:7042429	AT1G76100	at1:28553987	WGD
AT1G20370	at1:7051577	AT1G76120	at1:28558670	WGD
AT1G20380	at1:7061665	AT1G76140	at1:28571130	WGD
AT1G20440	at1:7084409	AT1G76180	at1:28586773	WGD
AT1G20460	at1:7091361	AT1G76185	at1:28590325	WGD
AT1G20470	at1:7094260	AT1G76190	at1:28592225	WGD
AT1G20520	at1:7106922	AT1G76210	at1:28594950	WGD
AT1G20520	at1:7106922	AT4G35690	at4:16921803	WGD
AT1G20540	at1:7112611	AT1G76260	at1:28610265	WGD
AT1G20550	at1:7115241	AT1G76270	at1:28613207	WGD
AT1G20560	at1:7119676	AT1G76290	at1:28623443	WGD
AT1G20580	at1:7128884	AT1G76300	at1:28625884	WGD
AT1G20590	at1:7131166	AT1G76310	at1:28628046	WGD
AT1G20590	at1:7131166	AT4G35620	at4:16901621	WGD
AT1G20640	at1:7154410	AT1G76350	at1:28639577	WGD
AT1G20650	at1:7158244	AT1G76370	at1:28648449	WGD
AT1G20670	at1:7164190	AT1G76380	at1:28651154	WGD
AT1G20693	at1:7176775	AT4G35570	at4:16887165	WGD
AT1G20700	at1:7182558	AT4G35550	at4:16875521	WGD
AT1G20780	at1:7217128	AT1G76390	at1:28655399	WGD
AT1G20816	at1:7233768	AT1G76405	at1:28661884	WGD
AT1G20823	at1:7238800	AT1G76410	at1:28668848	WGD
AT1G20823	at1:7238800	AT4G35480	at4:16852074	WGD
AT1G20860	at1:7254007	AT1G76430	at1:28678935	WGD
AT1G20870	at1:7259102	AT1G76440	at1:28682129	WGD
AT1G20880	at1:7262317	AT1G76460	at1:28686181	WGD
AT1G20890	at1:7265823	AT1G76480	at1:28692076	WGD
AT1G20900	at1:7272556	AT1G76500	at1:28705527	WGD
AT1G20900	at1:7272556	AT4G35390	at4:16829326	WGD
AT1G20910	at1:7276943	AT1G76510	at1:28708715	WGD
AT1G20925	at1:7289973	AT1G76520	at1:28715078	WGD
AT1G20930	at1:7292568	AT1G76540	at1:28720328	WGD
AT1G20950	at1:7297239	AT1G76550	at1:28722702	WGD
AT1G20980	at1:7324588	AT1G76580	at1:28734234	WGD
AT1G21000	at1:7337728	AT1G76590	at1:28740691	WGD
AT1G21010	at1:7346156	AT1G76600	at1:28746888	WGD
AT1G21050	at1:7366775	AT1G76610	at1:28750988	WGD
AT1G21060	at1:7371666	AT1G76620	at1:28756521	WGD
AT1G21070	at1:7375869	AT1G76670	at1:28772600	WGD
AT1G21080	at1:7378538	AT1G76700	at1:28780408	WGD
AT1G21100	at1:7386839	AT1G76790	at1:28822186	WGD
AT1G21140	at1:7404383	AT1G76800	at1:28829308	WGD
AT1G21160	at1:7407955	AT1G76810	at1:28831003	WGD
AT1G21170	at1:7413050	AT1G76850	at1:28847951	WGD
AT1G21190	at1:7419678	AT1G76860	at1:28854414	WGD
AT1G21200	at1:7421217	AT1G76870	at1:28857250	WGD
AT1G21320	at1:7462834	AT1G76940	at1:28902428	WGD
AT1G21380	at1:7485636	AT1G76970	at1:28922666	WGD
AT1G21390	at1:7489151	AT1G76980	at1:28926366	WGD
AT1G21410	at1:7497141	AT1G77000	at1:28940147	WGD
AT1G21440	at1:7502159	AT1G77060	at1:28951685	WGD
AT1G21530	at1:7545151	AT1G77240	at1:29017958	WGD
AT1G21560	at1:7554784	AT1G77270	at1:29027778	WGD
AT1G21590	at1:7566232	AT1G77280	at1:29031468	WGD
AT1G21610	at1:7573922	AT1G77310	at1:29051505	WGD
AT1G21720	at1:7626283	AT1G77440	at1:29096020	WGD
AT1G21740	at1:7641580	AT1G77500	at1:29121489	WGD
AT1G21750	at1:7645701	AT1G77510	at1:29126650	WGD
AT1G21770	at1:7651646	AT1G77540	at1:29137626	WGD
AT1G21810	at1:7656399	AT1G77580	at1:29144027	WGD
AT1G21870	at1:7678208	AT1G77610	at1:29165210	WGD
AT1G21880	at1:7680481	AT1G77630	at1:29173457	WGD
AT1G21910	at1:7696536	AT1G77640	at1:29178737	WGD
AT1G21920	at1:7704255	AT1G77660	at1:29185899	WGD
AT1G21980	at1:7734739	AT1G77740	at1:29220538	WGD
AT1G22015	at1:7751002	AT1G77810	at1:29260562	WGD
AT1G22030	at1:7759164	AT1G77855	at1:29277166	WGD
AT1G22050	at1:7771670	AT1G77870	at1:29285078	WGD
AT1G22070	at1:7789348	AT1G77920	at1:29298243	WGD
AT1G22110	at1:7800507	AT1G77932	at1:29302725	WGD
AT1G22130	at1:7812387	AT1G77950	at1:29307029	WGD
AT1G22150	at1:7818361	AT1G77990	at1:29317899	WGD
AT1G22150	at1:7818361	AT4G08620	at4:5500313	WGD
AT1G22160	at1:7823149	AT1G78020	at1:29338693	WGD
AT1G22170	at1:7826289	AT1G78050	at1:29347581	WGD
AT1G22180	at1:7828328	AT4G08690	at4:5551315	WGD
AT1G22190	at1:7835782	AT1G78080	at1:29364249	WGD
AT1G22210	at1:7841518	AT1G78090	at1:29373889	WGD
AT1G22220	at1:7846602	AT1G78100	at1:29387795	WGD
AT1G22230	at1:7849861	AT1G78110	at1:29391827	WGD
AT1G22240	at1:7853084	AT1G78160	at1:29407900	WGD
AT1G22240	at1:7853084	AT4G08840	at4:5631298	WGD
AT1G22250	at1:7858864	AT1G78170	at1:29414059	WGD
AT1G22250	at1:7858864	AT4G08910	at4:5712346	WGD
AT1G22270	at1:7865481	AT1G78190	at1:29418620	WGD
AT1G22280	at1:7873933	AT1G78200	at1:29420253	WGD
AT1G22300	at1:7878867	AT1G78220	at1:29425721	WGD
AT1G22330	at1:7886542	AT1G78260	at1:29446985	WGD
AT1G22340	at1:7890464	AT1G78270	at1:29450563	WGD
AT1G22470	at1:7932854	AT1G72240	at1:27190179	WGD
AT1G22480	at1:7934162	AT1G72230	at1:27188066	WGD
AT1G22490	at1:7938251	AT1G72210	at1:27179790	WGD
AT1G22500	at1:7949476	AT1G72200	at1:27169795	WGD
AT1G22500	at1:7949476	AT4G09120	at4:5813998	WGD
AT1G22510	at1:7950818	AT1G72175	at1:27157875	WGD
AT1G22520	at1:7953022	AT1G72170	at1:27156335	WGD
AT1G22530	at1:7955493	AT1G72150	at1:27148460	WGD
AT1G22530	at1:7955493	AT4G09160	at4:5839683	WGD
AT1G22540	at1:7964042	AT1G72120	at1:27132097	WGD
AT1G22600	at1:7987141	AT1G72100	at1:27127212	WGD
AT1G22640	at1:8006195	AT4G09460	at4:5992966	WGD
AT1G22650	at1:8013382	AT1G72000	at1:27103277	WGD
AT1G22650	at1:8013382	AT4G09510	at4:6021274	WGD
AT1G22670	at1:8021854	AT1G71980	at1:27097903	WGD
AT1G22670	at1:8021854	AT4G09560	at4:6041342	WGD
AT1G22680	at1:8024967	AT1G71970	at1:27093028	WGD
AT1G22690	at1:8027294	AT4G09600	at4:6072804	WGD
AT1G22710	at1:8030641	AT1G71880	at1:27054180	WGD
AT1G22740	at1:8049100	AT4G09720	at4:6133296	WGD
AT1G22760	at1:8055325	AT1G71770	at1:26990525	WGD
AT1G22780	at1:8067864	AT4G09800	at4:6173715	WGD
AT1G22810	at1:8074231	AT1G71520	at1:26938525	WGD
AT1G22830	at1:8076728	AT1G71490	at1:26932905	WGD
AT1G22840	at1:8079287	AT4G10040	at4:6276998	WGD
AT1G22870	at1:8089501	AT1G71410	at1:26912726	WGD
AT1G22880	at1:8095502	AT1G71380	at1:26899784	WGD
AT1G22882	at1:8098767	AT1G71360	at1:26892100	WGD
AT1G22920	at1:8109714	AT1G71230	at1:26852461	WGD
AT1G22970	at1:8130716	AT1G71150	at1:26827146	WGD
AT1G22985	at1:8135213	AT1G71130	at1:26822788	WGD
AT1G22990	at1:8139165	AT1G71050	at1:26803153	WGD
AT1G23010	at1:8147264	AT1G71040	at1:26796966	WGD
AT1G23030	at1:8156646	AT1G71020	at1:26790597	WGD
AT1G23040	at1:8164959	AT1G70990	at1:26767297	WGD
AT1G23060	at1:8170807	AT1G70950	at1:26752689	WGD
AT1G23080	at1:8180605	AT1G70940	at1:26743054	WGD
AT1G23110	at1:8196608	AT1G70900	at1:26731813	WGD
AT1G23120	at1:8198720	AT1G70870	at1:26721020	WGD
AT1G23130	at1:8200383	AT1G70830	at1:26709947	WGD
AT1G23140	at1:8202261	AT1G70790	at1:26700584	WGD
AT1G23149	at1:8206549	AT1G70782	at1:26695166	WGD
AT1G23150	at1:8206549	AT1G70780	at1:26695166	WGD
AT1G23170	at1:8212724	AT1G70770	at1:26688230	WGD
AT1G23190	at1:8219869	AT1G70730	at1:26669020	WGD
AT1G23205	at1:8233997	AT1G70720	at1:26666408	WGD
AT1G23210	at1:8240174	AT1G70710	at1:26659132	WGD
AT1G23240	at1:8252755	AT1G70670	at1:26644582	WGD
AT1G23260	at1:8256986	AT1G70650	at1:26638075	WGD
AT1G23290	at1:8262984	AT1G70600	at1:26620923	WGD
AT1G23310	at1:8268404	AT1G70580	at1:26612632	WGD
AT1G23320	at1:8273423	AT1G70560	at1:26604855	WGD
AT1G23340	at1:8283644	AT1G70550	at1:26597313	WGD
AT1G23350	at1:8293595	AT1G70540	at1:26593930	WGD
AT1G23380	at1:8297291	AT1G70510	at1:26576486	WGD
AT1G23460	at1:8327312	AT1G70500	at1:26566579	WGD
AT1G23490	at1:8336683	AT1G70490	at1:26563924	WGD
AT1G23520	at1:8343424	AT1G70480	at1:26561824	WGD
AT1G23530	at1:8345595	AT1G70470	at1:26559359	WGD
AT1G23540	at1:8346827	AT1G70450	at1:26552576	WGD
AT1G23550	at1:8350793	AT1G70440	at1:26548952	WGD
AT1G23700	at1:8379454	AT1G70430	at1:26545414	WGD
AT1G23710	at1:8385251	AT1G70420	at1:26539574	WGD
AT1G23730	at1:8395557	AT1G70410	at1:26533926	WGD
AT1G23760	at1:8402046	AT1G60390	at1:22247474	WGD
AT1G23760	at1:8402046	AT1G70370	at1:26512722	WGD
AT1G23770	at1:8405214	AT1G70360	at1:26508778	WGD
AT1G23790	at1:8409963	AT1G70340	at1:26503961	WGD
AT1G23820	at1:8420265	AT1G70310	at1:26485306	WGD
AT1G23870	at1:8432179	AT1G60140	at1:22176934	WGD
AT1G23870	at1:8432179	AT1G70290	at1:26471078	WGD
AT1G23880	at1:8435657	AT1G70280	at1:26465893	WGD
AT1G23900	at1:8441146	AT1G60070	at1:22142605	WGD
AT1G23965	at1:8480422	AT1G70270	at1:26464400	WGD
AT1G24050	at1:8507010	AT1G70220	at1:26446136	WGD
AT1G24120	at1:8529143	AT1G59980	at1:22080789	WGD
AT1G24140	at1:8536045	AT1G59970	at1:22073534	WGD
AT1G24140	at1:8536045	AT1G70170	at1:26423874	WGD
AT1G24150	at1:8549518	AT1G59910	at1:22053951	WGD
AT1G24150	at1:8549518	AT1G70140	at1:26412688	WGD
AT1G24159	at1:8552775	AT1G70110	at1:26406238	WGD
AT1G24160	at1:8553411	AT1G70100	at1:26403124	WGD
AT1G24170	at1:8557216	AT1G70090	at1:26400790	WGD
AT1G24180	at1:8560525	AT1G59900	at1:22051295	WGD
AT1G24190	at1:8563558	AT1G59890	at1:22043829	WGD
AT1G24200	at1:8571173	AT1G70060	at1:26383244	WGD
AT1G24320	at1:8626315	AT1G67490	at1:25280451	WGD
AT1G24330	at1:8631440	AT1G67530	at1:25308040	WGD
AT1G24350	at1:8638982	AT1G67600	at1:25336423	WGD
AT1G24400	at1:8651407	AT1G67640	at1:25352128	WGD
AT1G24470	at1:8674056	AT1G67730	at1:25391460	WGD
AT1G24510	at1:8685271	AT1G67760	at1:25405580	WGD
AT1G24570	at1:8707197	AT1G67850	at1:25437914	WGD
AT1G24577	at1:8712478	AT1G67910	at1:25471288	WGD
AT1G24580	at1:8710180	AT1G67856	at1:25442404	WGD
AT1G24600	at1:8720309	AT1G67920	at1:25473544	WGD
AT1G24735	at1:8757977	AT1G67980	at1:25487714	WGD
AT1G24764	at1:8759533	AT1G68060	at1:25510941	WGD
AT1G25240	at1:8845231	AT1G68110	at1:25524718	WGD
AT1G25250	at1:8849549	AT1G68130	at1:25532244	WGD
AT1G25270	at1:8857726	AT1G68170	at1:25551922	WGD
AT1G25340	at1:8885081	AT1G68320	at1:25603842	WGD
AT1G25370	at1:8897755	AT1G68340	at1:25614197	WGD
AT1G25400	at1:8911130	AT1G68440	at1:25658033	WGD
AT1G25410	at1:8914191	AT1G68460	at1:25668610	WGD
AT1G25422	at1:8918852	AT1G68500	at1:25702003	WGD
AT1G25440	at1:8933716	AT1G68520	at1:25709114	WGD
AT1G25450	at1:8938479	AT1G68530	at1:25712588	WGD
AT1G25460	at1:8942811	AT1G68540	at1:25720026	WGD
AT1G25470	at1:8944609	AT1G68550	at1:25725455	WGD
AT1G25470	at1:8944609	AT3G25890	at3:9475350	WGD
AT1G25472	at1:8944609	AT1G68552	at1:25725455	WGD
AT1G25480	at1:8948465	AT1G68600	at1:25759842	WGD
AT1G25490	at1:8951202	AT3G25800	at3:9422588	WGD
AT1G25520	at1:8962125	AT1G68650	at1:25775741	WGD
AT1G25550	at1:8976434	AT1G68670	at1:25782029	WGD
AT1G25550	at1:8976434	AT3G25790	at3:9413127	WGD
AT1G25560	at1:8981677	AT3G25730	at3:9396420	WGD
AT1G26130	at1:9033218	AT1G68710	at1:25793207	WGD
AT1G26130	at1:9033218	AT3G25610	at3:9308942	WGD
AT1G26200	at1:9063471	AT3G25540	at3:9274335	WGD
AT1G26210	at1:9067039	AT1G68870	at1:25889081	WGD
AT1G26260	at1:9087214	AT1G68920	at1:25915060	WGD
AT1G26270	at1:9089524	AT2G03890	at2:1185525	WGD
AT1G26300	at1:9098757	AT1G69030	at1:25947265	WGD
AT1G26310	at1:9100153	AT1G69120	at1:25982330	WGD
AT1G26355	at1:9117950	AT1G69230	at1:26026312	WGD
AT1G26355	at1:9117950	AT2G03680	at2:1120800	WGD
AT1G26360	at1:9118948	AT1G69240	at1:26027976	WGD
AT1G26440	at1:9143967	AT2G03520	at2:1069491	WGD
AT1G26450	at1:9148710	AT1G69295	at1:26050197	WGD
AT1G26450	at1:9148710	AT2G03505	at2:1064236	WGD
AT1G26580	at1:9184606	AT2G03470	at2:1045456	WGD
AT1G26600	at1:9191607	AT1G69320	at1:26061862	WGD
AT1G26620	at1:9195838	AT1G69360	at1:26072284	WGD
AT1G26630	at1:9205836	AT1G69410	at1:26089202	WGD
AT1G26650	at1:9210089	AT1G69430	at1:26097787	WGD
AT1G26670	at1:9215901	AT3G29100	at3:11075823	WGD
AT1G26690	at1:9224145	AT1G69460	at1:26111809	WGD
AT1G26690	at1:9224145	AT2G03290	at2:999422	WGD
AT1G26690	at1:9224145	AT3G29070	at3:11050130	WGD
AT1G26730	at1:9241435	AT1G69480	at1:26114112	WGD
AT1G26730	at1:9241435	AT2G03240	at2:973413	WGD
AT1G26730	at1:9241435	AT3G29060	at3:11044990	WGD
AT1G26740	at1:9244981	AT1G69485	at1:26118229	WGD
AT1G26770	at1:9259605	AT1G69530	at1:26141836	WGD
AT1G26770	at1:9259605	AT2G03090	at2:916854	WGD
AT1G26770	at1:9259605	AT3G29030	at3:11011308	WGD
AT1G26780	at1:9271029	AT1G69560	at1:26157755	WGD
AT1G26780	at1:9271029	AT3G29020	at3:11008614	WGD
AT1G26790	at1:9273857	AT1G69570	at1:26161528	WGD
AT1G26800	at1:9285099	AT2G03000	at2:875233	WGD
AT1G26820	at1:9292446	AT2G02990	at2:873506	WGD
AT1G26830	at1:9295736	AT1G69670	at1:26202031	WGD
AT1G26880	at1:9315383	AT3G28900	at3:10902647	WGD
AT1G26920	at1:9329512	AT1G69760	at1:26239260	WGD
AT1G26930	at1:9336057	AT2G02870	at2:837840	WGD
AT1G26945	at1:9351454	AT3G28857	at3:10855632	WGD
AT1G26960	at1:9355920	AT1G69780	at1:26258939	WGD
AT1G26970	at1:9359682	AT1G69790	at1:26266609	WGD
AT1G26970	at1:9359682	AT2G02800	at2:795515	WGD
AT1G27000	at1:9373926	AT2G02730	at2:764547	WGD
AT1G27040	at1:9386784	AT1G69850	at1:26296676	WGD
AT1G27080	at1:9400664	AT1G69860	at1:26309628	WGD
AT1G27100	at1:9407125	AT1G69890	at1:26323111	WGD
AT1G27100	at1:9407125	AT3G28630	at3:10728951	WGD
AT1G27130	at1:9425460	AT1G69920	at1:26334250	WGD
AT1G27190	at1:9446657	AT1G69990	at1:26360235	WGD
AT1G27190	at1:9446657	AT3G28450	at3:10667262	WGD
AT1G27220	at1:9463806	AT1G70060	at1:26383244	WGD
AT1G28050	at1:9775528	AT2G33500	at2:14187987	WGD
AT1G28070	at1:9782996	AT2G33510	at2:14194150	WGD
AT1G28110	at1:9803641	AT2G33530	at2:14197646	WGD
AT1G28180	at1:9843075	AT2G33730	at2:14265450	WGD
AT1G28220	at1:9860303	AT2G33750	at2:14271794	WGD
AT1G28270	at1:9883038	AT2G33775	at2:14288425	WGD
AT1G28280	at1:9886077	AT2G33780	at2:14291024	WGD
AT1G28290	at1:9889125	AT2G33790	at2:14293561	WGD
AT1G28330	at1:9933922	AT2G33830	at2:14309484	WGD
AT1G28350	at1:9944036	AT2G33840	at2:14314944	WGD
AT1G28395	at1:9969536	AT2G33847	at2:14318967	WGD
AT1G28400	at1:9972384	AT2G33850	at2:14321062	WGD
AT1G28550	at1:10036966	AT2G33870	at2:14337366	WGD
AT1G28960	at1:10109656	AT2G33980	at2:14349764	WGD
AT1G29010	at1:10117715	AT2G34010	at2:14368856	WGD
AT1G29020	at1:10120497	AT2G34020	at2:14371185	WGD
AT1G29030	at1:10129035	AT2G34040	at2:14377734	WGD
AT1G29050	at1:10136230	AT2G34070	at2:14387421	WGD
AT1G29080	at1:10157494	AT2G34080	at2:14393181	WGD
AT1G29160	at1:10183797	AT2G34140	at2:14413758	WGD
AT1G29170	at1:10190214	AT2G34150	at2:14419295	WGD
AT1G29230	at1:10214860	AT2G34180	at2:14430761	WGD
AT1G29310	at1:10252294	AT2G34250	at2:14462059	WGD
AT1G29470	at1:10310245	AT2G34300	at2:14473665	WGD
AT1G29530	at1:10324745	AT2G34310	at2:14477745	WGD
AT1G29540	at1:10327371	AT2G34330	at2:14486539	WGD
AT1G29550	at1:10330514	AT4G18040	at4:10016567	WGD
AT1G29640	at1:10355703	AT2G34340	at2:14488786	WGD
AT1G29710	at1:10387673	AT2G34370	at2:14510482	WGD
AT1G29760	at1:10422331	AT2G34380	at2:14512707	WGD
AT1G29770	at1:10424576	AT4G18140	at4:10046575	WGD
AT1G29860	at1:10454482	AT4G18170	at4:10061373	WGD
AT1G29890	at1:10463423	AT2G34410	at2:14518406	WGD
AT1G29910	at1:10472280	AT2G34420	at2:14522524	WGD
AT1G29965	at1:10498310	AT2G34480	at2:14532708	WGD
AT1G29980	at1:10503278	AT2G34510	at2:14543997	WGD
AT1G30040	at1:10537648	AT2G34555	at2:14556988	WGD
AT1G30080	at1:10550947	AT4G18340	at4:10130050	WGD
AT1G30100	at1:10571340	AT4G18350	at4:10142650	WGD
AT1G30120	at1:10584160	AT2G34590	at2:14568811	WGD
AT1G30135	at1:10596492	AT2G34600	at2:14573080	WGD
AT1G30190	at1:10618966	AT2G34610	at2:14575392	WGD
AT1G30200	at1:10625029	AT4G18380	at4:10157887	WGD
AT1G30210	at1:10627185	AT4G18390	at4:10162979	WGD
AT1G30400	at1:10727962	AT2G34660	at2:14602700	WGD
AT1G30490	at1:10796135	AT2G34710	at2:14639323	WGD
AT1G30500	at1:10804450	AT2G34720	at2:14649767	WGD
AT1G30590	at1:10835794	AT2G34750	at2:14660299	WGD
AT1G30620	at1:10854605	AT4G20460	at4:11029736	WGD
AT1G30700	at1:10892570	AT2G34790	at2:14673840	WGD
AT1G30710	at1:10895280	AT2G34810	at2:14685256	WGD
AT1G30810	at1:10937903	AT2G34880	at2:14711880	WGD
AT1G30810	at1:10937903	AT4G20400	at4:11008666	WGD
AT1G30820	at1:10944913	AT2G34890	at2:14718195	WGD
AT1G30820	at1:10944913	AT4G20320	at4:10974579	WGD
AT1G30850	at1:10985078	AT2G34910	at2:14726800	WGD
AT1G30850	at1:10985078	AT4G20190	at4:10906508	WGD
AT1G30850	at1:10985078	AT5G44660	at5:18015771	WGD
AT1G30860	at1:10986523	AT2G34920	at2:14728027	WGD
AT1G30860	at1:10986523	AT4G20160	at4:10890983	WGD
AT1G30860	at1:10986523	AT5G44690	at5:18029338	WGD
AT1G30900	at1:10997275	AT2G34940	at2:14740468	WGD
AT1G30900	at1:10997275	AT4G20110	at4:10875289	WGD
AT1G30910	at1:11000883	AT5G44720	at5:18042971	WGD
AT1G31010	at1:11054731	AT4G20010	at4:10841983	WGD
AT1G31010	at1:11054731	AT5G44785	at5:18070681	WGD
AT1G31020	at1:11057105	AT2G35010	at2:14754271	WGD
AT1G31070	at1:11084869	AT2G35020	at2:14756711	WGD
AT1G31120	at1:11104301	AT2G35060	at2:14775063	WGD
AT1G31120	at1:11104301	AT4G19960	at4:10813548	WGD
AT1G31130	at1:11114701	AT4G19950	at4:10809877	WGD
AT1G31130	at1:11114701	AT5G44860	at5:18110458	WGD
AT1G31230	at1:11158618	AT4G19710	at4:10724855	WGD
AT1G31260	at1:11175559	AT4G19680	at4:10703362	WGD
AT1G31260	at1:11175559	AT5G45105	at5:18223453	WGD
AT1G31300	at1:11193693	AT4G19645	at4:10689846	WGD
AT1G31310	at1:11198353	AT2G35640	at2:14982835	WGD
AT1G31340	at1:11217845	AT2G35635	at2:14980970	WGD
AT1G31420	at1:11249618	AT2G35620	at2:14960940	WGD
AT1G31450	at1:11259872	AT2G35615	at2:14959391	WGD
AT1G31470	at1:11262918	AT4G19450	at4:10606453	WGD
AT1G31470	at1:11262918	AT5G45275	at5:18334405	WGD
AT1G31670	at1:11337558	AT2G35612	at2:14955241	WGD
AT1G31720	at1:11356102	AT4G19370	at4:10566150	WGD
AT1G31760	at1:11372425	AT2G35605	at2:14946063	WGD
AT1G31850	at1:11430257	AT4G19120	at4:10460295	WGD
AT1G31880	at1:11445490	AT2G35600	at2:14940845	WGD
AT1G31885	at1:11450460	AT4G19030	at4:10421525	WGD
AT1G31940	at1:11470056	AT2G35585	at2:14936666	WGD
AT1G32130	at1:11558861	AT4G19000	at4:10405503	WGD
AT1G32150	at1:11565518	AT2G35530	at2:14922962	WGD
AT1G32170	at1:11575320	AT4G18990	at4:10401910	WGD
AT1G32210	at1:11605857	AT2G35520	at2:14921493	WGD
AT1G32230	at1:11612118	AT2G35510	at2:14916723	WGD
AT1G32260	at1:11640581	AT2G35480	at2:14910410	WGD
AT1G32270	at1:11642593	AT2G35460	at2:14905788	WGD
AT1G32330	at1:11656986	AT4G18870	at4:10346168	WGD
AT1G32360	at1:11672931	AT2G35430	at2:14900872	WGD
AT1G32361	at1:11675531	AT2G35420	at2:14899715	WGD
AT1G32380	at1:11681752	AT2G35390	at2:14895279	WGD
AT1G32470	at1:11739304	AT2G35370	at2:14891102	WGD
AT1G32490	at1:11742060	AT2G35340	at2:14872320	WGD
AT1G32530	at1:11759459	AT2G35330	at2:14868992	WGD
AT1G32560	at1:11774484	AT2G35300	at2:14862901	WGD
AT1G32580	at1:11784057	AT2G35240	at2:14844940	WGD
AT1G32610	at1:11795699	AT2G35230	at2:14842293	WGD
AT1G32690	at1:11820908	AT2G35200	at2:14833848	WGD
AT1G32760	at1:11858211	AT4G10630	at4:6566625	WGD
AT1G32790	at1:11874927	AT4G10610	at4:6557237	WGD
AT1G32810	at1:11881810	AT4G10600	at4:6547786	WGD
AT1G32850	at1:11902629	AT4G10570	at4:6523255	WGD
AT1G32970	at1:11948721	AT4G10540	at4:6512515	WGD
AT1G32980	at1:11954278	AT4G10520	at4:6499794	WGD
AT1G33040	at1:11966470	AT4G10480	at4:6477876	WGD
AT1G33050	at1:11967827	AT4G10470	at4:6476014	WGD
AT1G33120	at1:12010901	AT4G10450	at4:6462953	WGD
AT1G33170	at1:12027084	AT4G10440	at4:6459728	WGD
AT1G33230	at1:12046641	AT4G10430	at4:6454703	WGD
AT1G33260	at1:12064509	AT4G10390	at4:6441673	WGD
AT1G33280	at1:12072741	AT4G10350	at4:6415256	WGD
AT1G33475	at1:12147276	AT4G10170	at4:6344374	WGD
AT1G33480	at1:12148602	AT4G10150	at4:6328136	WGD
AT1G33490	at1:12150690	AT4G10140	at4:6322457	WGD
AT1G33680	at1:12203945	AT4G10070	at4:6295608	WGD
AT1G33700	at1:12208308	AT4G10060	at4:6288827	WGD
AT1G33770	at1:12242126	AT4G10010	at4:6263597	WGD
AT1G33800	at1:12261419	AT4G09990	at4:6258880	WGD
AT1G33950	at1:12333046	AT4G09950	at4:6234762	WGD
AT1G33990	at1:12355568	AT4G09900	at4:6221664	WGD
AT1G34020	at1:12366854	AT4G09810	at4:6175176	WGD
AT1G34030	at1:12370065	AT4G09800	at4:6173715	WGD
AT1G34200	at1:12455708	AT4G09670	at4:6107150	WGD
AT1G34470	at1:12604300	AT4G09640	at4:6088213	WGD
AT1G34550	at1:12646696	AT4G09630	at4:6083713	WGD
AT1G34780	at1:12748571	AT4G08930	at4:5729192	WGD
AT1G35140	at1:12851997	AT4G08950	at4:5740297	WGD
AT1G35160	at1:12867181	AT4G09000	at4:5775210	WGD
AT1G35330	at1:12965046	AT4G09100	at4:5811256	WGD
AT1G35430	at1:13030553	AT4G09170	at4:5842993	WGD
AT1G35460	at1:13039916	AT4G09180	at4:5847401	WGD
AT1G35470	at1:13051458	AT4G09200	at4:5859257	WGD
AT1G35515	at1:13077926	AT4G09460	at4:5992966	WGD
AT1G35580	at1:13122204	AT4G09510	at4:6021274	WGD
AT1G35625	at1:13158466	AT4G09560	at4:6041342	WGD
AT1G35670	at1:13205381	AT4G09570	at4:6049517	WGD
AT1G35730	at1:13227324	AT1G78160	at1:29407900	WGD
AT1G35780	at1:13277274	AT1G78150	at1:29404648	WGD
AT1G35910	at1:13363003	AT1G78090	at1:29373889	WGD
AT1G36060	at1:13454496	AT1G78080	at1:29364249	WGD
AT1G36070	at1:13466911	AT1G78070	at1:29355022	WGD
AT1G36240	at1:13614890	AT1G77940	at1:29303897	WGD
AT1G36730	at1:13898210	AT1G77840	at1:29268487	WGD
AT1G37130	at1:14158527	AT1G77760	at1:29235803	WGD
AT1G45000	at1:17009141	AT5G43010	at5:17248290	WGD
AT1G45050	at1:17031281	AT5G42990	at5:17243987	WGD
AT1G45145	at1:17074942	AT5G42980	at5:17242607	WGD
AT1G45170	at1:17095980	AT5G42960	at5:17235092	WGD
AT1G45180	at1:17098491	AT5G42940	at5:17216330	WGD
AT1G45201	at1:17123821	AT5G42930	at5:17210546	WGD
AT1G45233	at1:17152934	AT5G42920	at5:17206151	WGD
AT1G45249	at1:17166135	AT5G42910	at5:17203742	WGD
AT1G45545	at1:17180615	AT5G42880	at5:17191577	WGD
AT1G45688	at1:17191404	AT5G42860	at5:17183066	WGD
AT1G47250	at1:17319177	AT5G42790	at5:17159044	WGD
AT1G47960	at1:17681157	AT3G17140	at3:5846002	WGD
AT1G48010	at1:17711491	AT3G17220	at3:5883328	WGD
AT1G48030	at1:17717133	AT3G17240	at3:5891660	WGD
AT1G48040	at1:17719740	AT3G17250	at3:5892561	WGD
AT1G48110	at1:17769938	AT3G17330	at3:5916940	WGD
AT1G48210	at1:17798431	AT3G17410	at3:5955909	WGD
AT1G48230	at1:17805761	AT3G17430	at3:5965923	WGD
AT1G48240	at1:17809007	AT3G17440	at3:5969565	WGD
AT1G48260	at1:17813976	AT3G17510	at3:5988991	WGD
AT1G48330	at1:17863837	AT3G17580	at3:6015184	WGD
AT1G48350	at1:17867204	AT3G17626	at3:6027994	WGD
AT1G48370	at1:17874512	AT3G17650	at3:6034198	WGD
AT1G48405	at1:17884645	AT3G17680	at3:6042947	WGD
AT1G48430	at1:17902636	AT3G17770	at3:6081671	WGD
AT1G48440	at1:17906987	AT3G17780	at3:6086913	WGD
AT1G48450	at1:17908503	AT3G17800	at3:6091110	WGD
AT1G48470	at1:17913711	AT3G17820	at3:6097414	WGD
AT1G48480	at1:17918391	AT3G17840	at3:6106028	WGD
AT1G48490	at1:17921979	AT3G17850	at3:6109705	WGD
AT1G48500	at1:17931476	AT3G17860	at3:6120902	WGD
AT1G48510	at1:17934829	AT3G17910	at3:6133528	WGD
AT1G48540	at1:17945376	AT3G17920	at3:6137828	WGD
AT1G48590	at1:17962839	AT3G17980	at3:6152121	WGD
AT1G48600	at1:17965871	AT3G18000	at3:6154363	WGD
AT1G48605	at1:17969395	AT3G18030	at3:6167640	WGD
AT1G48620	at1:17973697	AT3G18035	at3:6169090	WGD
AT1G48630	at1:17981773	AT3G18130	at3:6210904	WGD
AT1G48635	at1:17983733	AT3G18160	at3:6220626	WGD
AT1G48700	at1:18011035	AT3G18210	at3:6237930	WGD
AT1G48750	at1:18035967	AT3G18280	at3:6267049	WGD
AT1G48770	at1:18040285	AT3G18295	at3:6281204	WGD
AT1G48780	at1:18041989	AT3G18300	at3:6281923	WGD
AT1G48840	at1:18061521	AT3G18350	at3:6296850	WGD
AT1G49000	at1:18123459	AT3G18560	at3:6393910	WGD
AT1G49160	at1:18179304	AT3G18750	at3:6454110	WGD
AT1G49200	at1:18198227	AT3G18773	at3:6465825	WGD
AT1G49240	at1:18215872	AT3G18780	at3:6474842	WGD
AT1G49270	at1:18227334	AT3G18810	at3:6480701	WGD
AT1G49300	at1:18234724	AT3G18820	at3:6484068	WGD
AT1G49400	at1:18283032	AT3G18880	at3:6509540	WGD
AT1G49450	at1:18305541	AT3G18950	at3:6536715	WGD
AT1G49475	at1:18312920	AT3G18960	at3:6542509	WGD
AT1G49480	at1:18314178	AT3G18990	at3:6548869	WGD
AT1G49490	at1:18317563	AT3G19020	at3:6558973	WGD
AT1G49500	at1:18321295	AT3G19030	at3:6563979	WGD
AT1G49520	at1:18329696	AT3G19080	at3:6595344	WGD
AT1G49580	at1:18351458	AT3G19100	at3:6605476	WGD
AT1G49600	at1:18356886	AT3G19130	at3:6611198	WGD
AT1G49620	at1:18365491	AT3G19150	at3:6616747	WGD
AT1G49630	at1:18367594	AT3G19170	at3:6625425	WGD
AT1G49710	at1:18391338	AT3G19280	at3:6681196	WGD
AT1G49720	at1:18400092	AT3G19290	at3:6687140	WGD
AT1G49730	at1:18402530	AT3G19300	at3:6690118	WGD
AT1G49740	at1:18407518	AT3G19310	at3:6694196	WGD
AT1G49750	at1:18410929	AT3G19320	at3:6696395	WGD
AT1G49760	at1:18416480	AT3G19350	at3:6705493	WGD
AT1G49780	at1:18428906	AT3G19380	at3:6714392	WGD
AT1G49810	at1:18440013	AT3G19490	at3:6754615	WGD
AT1G49830	at1:18445111	AT3G19500	at3:6759016	WGD
AT1G49840	at1:18452070	AT3G19540	at3:6780619	WGD
AT1G49890	at1:18470075	AT3G19570	at3:6797569	WGD
AT1G49900	at1:18473908	AT3G19580	at3:6803166	WGD
AT1G49910	at1:18479025	AT3G19590	at3:6805631	WGD
AT1G50040	at1:18542130	AT3G19680	at3:6840281	WGD
AT1G50060	at1:18551186	AT3G19690	at3:6842220	WGD
AT1G50090	at1:18554641	AT3G19710	at3:6846969	WGD
AT1G50140	at1:18569735	AT3G19740	at3:6855837	WGD
AT1G50260	at1:18617605	AT3G19830	at3:6886189	WGD
AT1G50280	at1:18623698	AT3G19850	at3:6898181	WGD
AT1G50310	at1:18635984	AT3G19930	at3:6934773	WGD
AT1G50350	at1:18648756	AT3G19950	at3:6942769	WGD
AT1G50360	at1:18649747	AT3G19960	at3:6948776	WGD
AT1G50370	at1:18658647	AT3G19980	at3:6961736	WGD
AT1G50400	at1:18668155	AT3G20000	at3:6967582	WGD
AT1G50410	at1:18672163	AT3G20010	at3:6971352	WGD
AT1G50460	at1:18693684	AT3G20040	at3:6994894	WGD
AT1G50490	at1:18704805	AT3G20060	at3:7002817	WGD
AT1G50520	at1:18719378	AT3G20100	at3:7018995	WGD
AT1G50610	at1:18742135	AT3G20190	at3:7044943	WGD
AT1G50620	at1:18748537	AT3G20280	at3:7071193	WGD
AT1G50630	at1:18751456	AT3G20300	at3:7079617	WGD
AT1G50640	at1:18757148	AT3G20310	at3:7084806	WGD
AT1G50660	at1:18770937	AT3G20350	at3:7096348	WGD
AT1G50700	at1:18781914	AT3G20410	at3:7116201	WGD
AT1G50740	at1:18807672	AT3G20510	at3:7160677	WGD
AT1G50840	at1:18839107	AT3G20540	at3:7168132	WGD
AT1G50930	at1:18876837	AT3G20557	at3:7180037	WGD
AT1G50950	at1:18880320	AT3G20560	at3:7182035	WGD
AT1G51060	at1:18926876	AT3G20670	at3:7229407	WGD
AT1G51130	at1:18939277	AT3G20760	at3:7256656	WGD
AT1G51170	at1:18953458	AT3G20830	at3:7284963	WGD
AT1G51190	at1:18977284	AT3G20840	at3:7300675	WGD
AT1G51220	at1:18989751	AT3G20880	at3:7313538	WGD
AT1G51355	at1:19041397	AT3G20898	at3:7323683	WGD
AT1G51390	at1:19050344	AT3G20970	at3:7348197	WGD
AT1G51400	at1:19052023	AT3G21055	at3:7376635	WGD
AT1G51460	at1:19076982	AT3G21080	at3:7388367	WGD
AT1G51520	at1:19106687	AT3G21100	at3:7400239	WGD
AT1G51560	at1:19119635	AT3G21140	at3:7409442	WGD
AT1G51590	at1:19128144	AT3G21160	at3:7413847	WGD
AT1G51600	at1:19132221	AT3G21175	at3:7422036	WGD
AT1G51630	at1:19141973	AT3G21190	at3:7432299	WGD
AT1G51660	at1:19154323	AT3G21220	at3:7445757	WGD
AT1G51680	at1:19159429	AT3G21230	at3:7448040	WGD
AT1G51700	at1:19174070	AT3G21270	at3:7474679	WGD
AT1G51710	at1:19175642	AT3G21280	at3:7477987	WGD
AT1G51745	at1:19191523	AT3G21295	at3:7489236	WGD
AT1G51770	at1:19201789	AT3G21310	at3:7497290	WGD
AT1G51800	at1:19214148	AT3G21340	at3:7511787	WGD
AT1G51950	at1:19305315	AT3G16500	at3:5612500	WGD
AT1G51960	at1:19310355	AT3G16490	at3:5603900	WGD
AT1G51980	at1:19323382	AT3G16480	at3:5599778	WGD
AT1G52030	at1:19345940	AT3G16440	at3:5585944	WGD
AT1G52030	at1:19345940	AT3G21380	at3:7528184	WGD
AT1G52140	at1:19407364	AT3G16330	at3:5535196	WGD
AT1G52160	at1:19420715	AT3G16260	at3:5509374	WGD
AT1G52180	at1:19424944	AT3G16240	at3:5505404	WGD
AT1G52190	at1:19434509	AT3G16180	at3:5481325	WGD
AT1G52191	at1:19439367	AT3G16175	at3:5480464	WGD
AT1G52230	at1:19454836	AT3G16140	at3:5468509	WGD
AT1G52240	at1:19458673	AT1G79860	at1:30042092	WGD
AT1G52240	at1:19458673	AT3G16120	at3:5464769	WGD
AT1G52260	at1:19460570	AT3G16110	at3:5460793	WGD
AT1G52280	at1:19467969	AT3G16100	at3:5459172	WGD
AT1G52300	at1:19474898	AT3G16080	at3:5454818	WGD
AT1G52315	at1:19481188	AT1G79910	at1:30054884	WGD
AT1G52360	at1:19499343	AT1G79990	at1:30085781	WGD
AT1G52360	at1:19499343	AT3G15980	at3:5411292	WGD
AT1G52380	at1:19508983	AT3G15970	at3:5408797	WGD
AT1G52410	at1:19520728	AT3G15950	at3:5397569	WGD
AT1G52420	at1:19527842	AT3G15940	at3:5393513	WGD
AT1G52520	at1:19565769	AT1G80010	at1:30097401	WGD
AT1G52540	at1:19570058	AT3G15890	at3:5374248	WGD
AT1G52565	at1:19579886	AT3G15760	at3:5337547	WGD
AT1G52570	at1:19583940	AT3G15730	at3:5330322	WGD
AT1G52600	at1:19590487	AT3G15710	at3:5323358	WGD
AT1G52660	at1:19613475	AT3G15700	at3:5321136	WGD
AT1G52670	at1:19614942	AT3G15690	at3:5316941	WGD
AT1G52690	at1:19619745	AT3G15670	at3:5309886	WGD
AT1G52695	at1:19621238	AT3G15650	at3:5305926	WGD
AT1G52710	at1:19638331	AT1G80230	at1:30169456	WGD
AT1G52710	at1:19638331	AT3G15640	at3:5299110	WGD
AT1G52720	at1:19640899	AT3G15630	at3:5296847	WGD
AT1G52730	at1:19642529	AT3G15610	at3:5290847	WGD
AT1G52750	at1:19646465	AT1G80280	at1:30183541	WGD
AT1G52770	at1:19655839	AT3G15570	at3:5269849	WGD
AT1G52790	at1:19662194	AT1G80320	at1:30196782	WGD
AT1G52830	at1:19672496	AT3G15540	at3:5264024	WGD
AT1G52855	at1:19682946	AT3G15534	at3:5258876	WGD
AT1G52880	at1:19688957	AT3G15510	at3:5243510	WGD
AT1G52890	at1:19697004	AT3G15500	at3:5234617	WGD
AT1G52910	at1:19708057	AT3G15480	at3:5226248	WGD
AT1G52930	at1:19711237	AT3G15460	at3:5214084	WGD
AT1G53023	at1:19754214	AT3G15355	at3:5183739	WGD
AT1G53030	at1:19760001	AT3G15352	at3:5179413	WGD
AT1G53035	at1:19761700	AT3G15358	at3:5178013	WGD
AT1G53060	at1:19776052	AT3G15356	at3:5174402	WGD
AT1G53090	at1:19783352	AT3G15354	at3:5169095	WGD
AT1G53100	at1:19786956	AT3G15350	at3:5166206	WGD
AT1G53110	at1:19790189	AT3G15340	at3:5159698	WGD
AT1G53160	at1:19806421	AT3G15270	at3:5140365	WGD
AT1G53163	at1:19812262	AT3G15250	at3:5136262	WGD
AT1G53165	at1:19813896	AT3G15220	at3:5126597	WGD
AT1G53170	at1:19821337	AT3G15210	at3:5121422	WGD
AT1G53180	at1:19831441	AT3G15115	at3:5085992	WGD
AT1G53190	at1:19837270	AT3G15070	at3:5070273	WGD
AT1G53230	at1:19849788	AT3G15030	at3:5061681	WGD
AT1G53240	at1:19854615	AT3G15020	at3:5056068	WGD
AT1G53260	at1:19859267	AT3G15000	at3:5050257	WGD
AT1G53280	at1:19864770	AT3G14990	at3:5047400	WGD
AT1G53290	at1:19871299	AT3G14960	at3:5035896	WGD
AT1G53300	at1:19879422	AT3G14950	at3:5030216	WGD
AT1G53310	at1:19884027	AT3G14940	at3:5025238	WGD
AT1G53380	at1:19913076	AT3G14870	at3:5002367	WGD
AT1G53420	at1:19926626	AT3G14840	at3:4988107	WGD
AT1G53450	at1:19951235	AT3G14830	at3:4982944	WGD
AT1G53470	at1:19958587	AT3G14810	at3:4970990	WGD
AT1G53500	at1:19966944	AT3G14790	at3:4964155	WGD
AT1G53510	at1:19970664	AT3G14720	at3:4945601	WGD
AT1G53560	at1:19984742	AT3G14595	at3:4908948	WGD
AT1G53590	at1:19996315	AT3G14590	at3:4904270	WGD
AT1G53650	at1:20029029	AT3G14450	at3:4849788	WGD
AT1G53660	at1:20034032	AT3G14410	at3:4815811	WGD
AT1G53700	at1:20048586	AT3G14370	at3:4797845	WGD
AT1G53708	at1:20052393	AT3G14362	at3:4793678	WGD
AT1G53730	at1:20061701	AT3G14350	at3:4782757	WGD
AT1G53820	at1:20091491	AT1G72310	at1:27225897	WGD
AT1G53820	at1:20091491	AT3G14320	at3:4777731	WGD
AT1G53830	at1:20098522	AT3G14310	at3:4771902	WGD
AT1G53840	at1:20101445	AT3G14300	at3:4766905	WGD
AT1G53850	at1:20103953	AT3G14290	at3:4764149	WGD
AT1G53870	at1:20112262	AT3G14260	at3:4747769	WGD
AT1G53880	at1:20115069	AT1G72340	at1:27236875	WGD
AT1G53910	at1:20135112	AT1G72360	at1:27241807	WGD
AT1G53910	at1:20135112	AT3G14230	at3:4737146	WGD
AT1G53920	at1:20137712	AT3G14225	at3:4734616	WGD
AT1G54000	at1:20154169	AT3G14210	at3:4729823	WGD
AT1G54060	at1:20180679	AT3G14180	at3:4707113	WGD
AT1G54080	at1:20183581	AT3G14100	at3:4672919	WGD
AT1G54090	at1:20189567	AT1G72470	at1:27283693	WGD
AT1G54090	at1:20189567	AT3G14090	at3:4669253	WGD
AT1G54095	at1:20192962	AT1G72510	at1:27303366	WGD
AT1G54115	at1:20202118	AT3G14070	at3:4661143	WGD
AT1G54120	at1:20207020	AT3G14060	at3:4657046	WGD
AT1G54130	at1:20210873	AT3G14050	at3:4650757	WGD
AT1G54160	at1:20217336	AT3G14020	at3:4642280	WGD
AT1G54170	at1:20221060	AT3G14010	at3:4636380	WGD
AT1G54180	at1:20227277	AT3G14000	at3:4630869	WGD
AT1G54200	at1:20235712	AT3G13980	at3:4619038	WGD
AT1G54210	at1:20241226	AT3G13970	at3:4613506	WGD
AT1G54220	at1:20246037	AT3G13930	at3:4595876	WGD
AT1G54270	at1:20259692	AT3G13920	at3:4592256	WGD
AT1G54280	at1:20262766	AT1G72700	at1:27365896	WGD
AT1G54280	at1:20262766	AT3G13900	at3:4586151	WGD
AT1G55110	at1:20560284	AT3G13810	at3:4544490	WGD
AT1G55120	at1:20566030	AT3G13784	at3:4528529	WGD
AT1G55130	at1:20569654	AT3G13772	at3:4521532	WGD
AT1G55140	at1:20572405	AT3G13740	at3:4504276	WGD
AT1G55190	at1:20588397	AT3G13710	at3:4490628	WGD
AT1G55200	at1:20589129	AT3G13690	at3:4485735	WGD
AT1G55200	at1:20589129	AT5G56790	at5:22967939	WGD
AT1G55210	at1:20597869	AT3G13650	at3:4462892	WGD
AT1G55290	at1:20626121	AT3G13610	at3:4449374	WGD
AT1G55310	at1:20630065	AT3G13570	at3:4429298	WGD
AT1G55330	at1:20648465	AT3G13520	at3:4408925	WGD
AT1G55360	at1:20666222	AT3G13510	at3:4403500	WGD
AT1G55360	at1:20666222	AT5G56530	at5:22889132	WGD
AT1G55475	at1:20711514	AT3G13480	at3:4392956	WGD
AT1G55490	at1:20715563	AT3G13470	at3:4389256	WGD
AT1G55490	at1:20715563	AT5G56500	at5:22873791	WGD
AT1G55500	at1:20719548	AT3G13460	at3:4384714	WGD
AT1G55510	at1:20723302	AT3G13450	at3:4382198	WGD
AT1G55520	at1:20725726	AT3G13445	at3:4379793	WGD
AT1G55530	at1:20729182	AT3G13430	at3:4367181	WGD
AT1G55530	at1:20729182	AT5G56340	at5:22817560	WGD
AT1G55535	at1:20731646	AT3G13420	at3:4364527	WGD
AT1G55546	at1:20743828	AT3G13410	at3:4361857	WGD
AT1G55560	at1:20754321	AT3G13390	at3:4351045	WGD
AT1G55600	at1:20774046	AT5G56270	at5:22779693	WGD
AT1G55610	at1:20779874	AT3G13380	at3:4346557	WGD
AT1G55640	at1:20793771	AT5G56230	at5:22758768	WGD
AT1G55650	at1:20796340	AT3G13350	at3:4335475	WGD
AT1G55680	at1:20804592	AT3G13340	at3:4331756	WGD
AT1G55680	at1:20804592	AT5G56190	at5:22742005	WGD
AT1G55690	at1:20808261	AT5G56160	at5:22731974	WGD
AT1G55720	at1:20828118	AT3G13320	at3:4314529	WGD
AT1G55800	at1:20856922	AT5G56075	at5:22709756	WGD
AT1G55820	at1:20864339	AT3G13222	at3:4251014	WGD
AT1G55890	at1:20901346	AT3G13150	at3:4227740	WGD
AT1G55920	at1:20912116	AT3G13110	at3:4214617	WGD
AT1G55930	at1:20918717	AT3G13070	at3:4191351	WGD
AT1G55960	at1:20927643	AT3G13062	at3:4184569	WGD
AT1G55970	at1:20932129	AT3G12980	at3:4146499	WGD
AT1G56010	at1:20946571	AT3G12977	at3:4143726	WGD
AT1G56020	at1:20952144	AT3G12970	at3:4141051	WGD
AT1G56070	at1:20967930	AT3G12915	at3:4112629	WGD
AT1G56100	at1:20980369	AT3G12880	at3:4095535	WGD
AT1G56110	at1:20984389	AT3G12860	at3:4091570	WGD
AT1G56150	at1:21017385	AT3G12830	at3:4078651	WGD
AT1G56160	at1:21022384	AT3G12820	at3:4074158	WGD
AT1G56190	at1:21028238	AT3G12780	at3:4060971	WGD
AT1G56410	at1:21117147	AT3G12580	at3:3991261	WGD
AT1G59730	at1:21952634	AT1G69880	at1:26321479	WGD
AT1G59830	at1:22020552	AT1G69960	at1:26348721	WGD
AT1G59890	at1:22043829	AT1G70030	at1:26378794	WGD
AT1G59910	at1:22053951	AT1G70140	at1:26412688	WGD
AT1G59970	at1:22073534	AT1G70170	at1:26423874	WGD
AT1G60050	at1:22121550	AT1G70260	at1:26456844	WGD
AT1G60140	at1:22176934	AT1G70290	at1:26471078	WGD
AT1G60170	at1:22192773	AT1G70400	at1:26532421	WGD
AT1G61795	at1:22819632	AT4G04900	at4:2486218	WGD
AT1G61810	at1:22830015	AT4G21760	at4:11561229	WGD
AT1G61890	at1:22867770	AT4G21903	at4:11620998	WGD
AT1G61930	at1:22893101	AT4G21930	at4:11639757	WGD
AT1G61950	at1:22899417	AT4G04720	at4:2394458	WGD
AT1G61950	at1:22899417	AT4G21940	at4:11640802	WGD
AT1G62040	at1:22932760	AT4G04620	at4:2328496	WGD
AT1G62040	at1:22932760	AT4G21980	at4:11655613	WGD
AT1G62180	at1:22975760	AT4G04610	at4:2325003	WGD
AT1G62180	at1:22975760	AT4G21990	at4:11657008	WGD
AT1G62290	at1:23009911	AT4G04460	at4:2224551	WGD
AT1G62290	at1:23009911	AT4G22050	at4:11683865	WGD
AT1G62300	at1:23016683	AT4G04450	at4:2218379	WGD
AT1G62300	at1:23016683	AT4G22070	at4:11691378	WGD
AT1G62320	at1:23041668	AT4G04340	at4:2122688	WGD
AT1G62320	at1:23041668	AT4G22120	at4:11715824	WGD
AT1G62370	at1:23072575	AT4G03965	at4:1889473	WGD
AT1G62370	at1:23072575	AT4G22250	at4:11767513	WGD
AT1G62430	at1:23105941	AT4G22340	at4:11799959	WGD
AT1G62500	at1:23132045	AT4G12470	at4:7401109	WGD
AT1G62510	at1:23136369	AT4G22460	at4:11839160	WGD
AT1G62520	at1:23144412	AT4G12450	at4:7385802	WGD
AT1G62520	at1:23144412	AT4G22560	at4:11880119	WGD
AT1G62590	at1:23176930	AT1G63400	at1:23507320	WGD
AT1G62610	at1:23181463	AT1G63380	at1:23505582	WGD
AT1G62620	at1:23182644	AT1G63370	at1:23503205	WGD
AT1G62630	at1:23185912	AT1G63350	at1:23494935	WGD
AT1G62670	at1:23204773	AT1G63320	at1:23488884	WGD
AT1G62740	at1:23230956	AT4G12400	at4:7338659	WGD
AT1G62740	at1:23230956	AT4G22670	at4:11918080	WGD
AT1G62770	at1:23245886	AT4G12390	at4:7336497	WGD
AT1G62790	at1:23252321	AT4G12360	at4:7327992	WGD
AT1G62810	at1:23257726	AT4G12270	at4:7297808	WGD
AT1G62880	at1:23291929	AT4G12090	at4:7242165	WGD
AT1G62900	at1:23297720	AT1G63140	at1:23417494	WGD
AT1G62910	at1:23299057	AT1G63130	at1:23412730	WGD
AT1G62981	at1:23333632	AT4G11950	at4:7173276	WGD
AT1G63010	at1:23347718	AT4G11810	at4:7104510	WGD
AT1G63170	at1:23425352	AT4G11680	at4:7053443	WGD
AT1G63300	at1:23482193	AT5G41140	at5:16468434	WGD
AT1G63400	at1:23507320	AT5G41170	at5:16478486	WGD
AT1G63420	at1:23515874	AT2G45830	at2:18866061	WGD
AT1G63430	at1:23522497	AT5G41180	at5:16483871	WGD
AT1G63450	at1:23531409	AT5G41250	at5:16501217	WGD
AT1G63470	at1:23536519	AT2G45850	at2:18871479	WGD
AT1G63500	at1:23555686	AT5G41260	at5:16503774	WGD
AT1G63550	at1:23569538	AT5G41280	at5:16509509	WGD
AT1G63580	at1:23577333	AT5G41290	at5:16512326	WGD
AT1G63640	at1:23589067	AT5G41310	at5:16516634	WGD
AT1G63650	at1:23599505	AT5G41315	at5:16529455	WGD
AT1G63710	at1:23632178	AT2G45970	at2:18912260	WGD
AT1G63800	at1:23667616	AT2G46030	at2:18932019	WGD
AT1G63800	at1:23667616	AT5G41340	at5:16538081	WGD
AT1G63820	at1:23682422	AT5G41380	at5:16561278	WGD
AT1G63830	at1:23685199	AT4G23470	at4:12249049	WGD
AT1G63830	at1:23685199	AT5G41390	at5:16566098	WGD
AT1G63840	at1:23689697	AT4G11360	at4:6906014	WGD
AT1G63840	at1:23689697	AT5G41400	at5:16569377	WGD
AT1G63930	at1:23727891	AT4G11300	at4:6872151	WGD
AT1G63930	at1:23727891	AT4G23530	at4:12279075	WGD
AT1G64000	at1:23747304	AT2G46130	at2:18957290	WGD
AT1G64000	at1:23747304	AT5G41570	at5:16624214	WGD
AT1G64040	at1:23758283	AT4G11240	at4:6847112	WGD
AT1G64060	at1:23769774	AT4G11230	at4:6840491	WGD
AT1G64065	at1:23778353	AT2G46150	at2:18961403	WGD
AT1G64090	at1:23789309	AT2G46170	at2:18965313	WGD
AT1G64090	at1:23789309	AT4G11220	at4:6837911	WGD
AT1G64090	at1:23789309	AT4G23630	at4:12317059	WGD
AT1G64090	at1:23789309	AT5G41600	at5:16636130	WGD
AT1G64160	at1:23814010	AT4G11180	at4:6820033	WGD
AT1G64160	at1:23814010	AT4G23690	at4:12338871	WGD
AT1G64170	at1:23815239	AT4G23700	at4:12342428	WGD
AT1G64170	at1:23815239	AT5G41610	at5:16638370	WGD
AT1G64180	at1:23821516	AT2G46250	at2:18991171	WGD
AT1G64180	at1:23821516	AT5G41620	at5:16646330	WGD
AT1G64185	at1:23824514	AT5G41650	at5:16654913	WGD
AT1G64190	at1:23825328	AT5G41670	at5:16665283	WGD
AT1G64200	at1:23828526	AT4G11150	at4:6799935	WGD
AT1G64210	at1:23831033	AT4G23740	at4:12366386	WGD
AT1G64210	at1:23831033	AT5G41680	at5:16667885	WGD
AT1G64220	at1:23833088	AT5G41685	at5:16669149	WGD
AT1G64230	at1:23833568	AT5G41700	at5:16675824	WGD
AT1G64290	at1:23857178	AT5G41720	at5:16683165	WGD
AT1G64300	at1:23863095	AT5G41730	at5:16684914	WGD
AT1G64320	at1:23869036	AT5G41780	at5:16723075	WGD
AT1G64330	at1:23870905	AT5G41790	at5:16727530	WGD
AT1G64340	at1:23878125	AT5G41810	at5:16738067	WGD
AT1G64390	at1:23911119	AT4G11050	at4:6747467	WGD
AT1G64400	at1:23915598	AT4G11030	at4:6738120	WGD
AT1G64400	at1:23915598	AT4G23850	at4:12403454	WGD
AT1G64440	at1:23937030	AT4G10960	at4:6713557	WGD
AT1G64440	at1:23937030	AT4G23920	at4:12431277	WGD
AT1G64450	at1:23941598	AT4G23930	at4:12436000	WGD
AT1G64520	at1:23956386	AT5G42040	at5:16813835	WGD
AT1G64530	at1:23959661	AT4G24020	at4:12479752	WGD
AT1G64590	at1:23993533	AT4G24050	at4:12497055	WGD
AT1G64620	at1:24006992	AT4G24060	at4:12503782	WGD
AT1G64670	at1:24030820	AT4G24140	at4:12529875	WGD
AT1G65630	at1:24406542	AT5G36950	at5:14594981	WGD
AT1G65690	at1:24431430	AT5G36970	at5:14604367	WGD
AT1G65710	at1:24436901	AT5G37010	at5:14620732	WGD
AT1G65780	at1:24462958	AT5G37140	at5:14690436	WGD
AT1G65960	at1:24552003	AT2G02000	at2:469370	WGD
AT1G66000	at1:24574344	AT5G37410	at5:14836661	WGD
AT1G66060	at1:24593915	AT5G37460	at5:14858494	WGD
AT1G66070	at1:24595774	AT5G37475	at5:14866057	WGD
AT1G66150	at1:24631409	AT2G01820	at2:357431	WGD
AT1G66160	at1:24637196	AT5G37490	at5:14887478	WGD
AT1G66170	at1:24638685	AT2G01810	at2:347537	WGD
AT1G66180	at1:24647188	AT5G37540	at5:14912835	WGD
AT1G66190	at1:24652795	AT5G37550	at5:14918901	WGD
AT1G66200	at1:24655210	AT5G37600	at5:14933336	WGD
AT1G66250	at1:24692894	AT2G01630	at2:279282	WGD
AT1G66260	at1:24695646	AT5G37720	at5:14981638	WGD
AT1G66350	at1:24748195	AT2G01570	at2:255249	WGD
AT1G66360	at1:24751377	AT2G01540	at2:242123	WGD
AT1G66360	at1:24751377	AT5G37740	at5:14992005	WGD
AT1G66400	at1:24770575	AT5G37770	at5:14998854	WGD
AT1G66410	at1:24774217	AT5G37780	at5:15004527	WGD
AT1G66420	at1:24777184	AT2G01370	at2:168631	WGD
AT1G66460	at1:24789735	AT5G37790	at5:15008172	WGD
AT1G66470	at1:24795214	AT5G37800	at5:15036197	WGD
AT1G66480	at1:24805635	AT2G01340	at2:163954	WGD
AT1G66480	at1:24805635	AT5G37840	at5:15062008	WGD
AT1G66610	at1:24849716	AT5G37870	at5:15073764	WGD
AT1G66700	at1:24873293	AT5G38100	at5:15199489	WGD
AT1G66740	at1:24892340	AT5G38110	at5:15208470	WGD
AT1G66840	at1:24933856	AT5G38150	at5:15223116	WGD
AT1G66850	at1:24936958	AT5G38160	at5:15225767	WGD
AT1G66860	at1:24942188	AT5G38200	at5:15256276	WGD
AT1G66880	at1:24946928	AT5G38210	at5:15261005	WGD
AT1G66900	at1:24959334	AT5G38220	at5:15268868	WGD
AT1G66930	at1:24970523	AT5G38250	at5:15280643	WGD
AT1G67035	at1:25018173	AT5G38300	at5:15305932	WGD
AT1G67050	at1:25028627	AT5G38320	at5:15316015	WGD
AT1G67090	at1:25048158	AT5G38410	at5:15377173	WGD
AT1G67110	at1:25061731	AT5G38450	at5:15393754	WGD
AT1G67210	at1:25140815	AT5G38600	at5:15456595	WGD
AT1G67250	at1:25163642	AT5G38650	at5:15470961	WGD
AT1G67270	at1:25183177	AT5G38690	at5:15479177	WGD
AT1G68880	at1:25894237	AT3G30530	at3:12139512	WGD
AT1G69040	at1:25957819	AT2G03730	at2:1137611	WGD
AT1G69080	at1:25971915	AT2G03720	at2:1132170	WGD
AT1G69120	at1:25982330	AT2G03710	at2:1129289	WGD
AT1G69120	at1:25982330	AT3G30260	at3:11909119	WGD
AT1G69230	at1:26026312	AT2G03680	at2:1120800	WGD
AT1G69240	at1:26027976	AT3G29770	at3:11648341	WGD
AT1G69250	at1:26032827	AT2G03640	at2:1104307	WGD
AT1G69260	at1:26039048	AT3G29575	at3:11382250	WGD
AT1G69295	at1:26050197	AT2G03505	at2:1064236	WGD
AT1G69330	at1:26063816	AT3G29270	at3:11234314	WGD
AT1G69370	at1:26079956	AT3G29200	at3:11164393	WGD
AT1G69460	at1:26111809	AT2G03290	at2:999422	WGD
AT1G69460	at1:26111809	AT3G29070	at3:11050130	WGD
AT1G69480	at1:26114112	AT2G03240	at2:973413	WGD
AT1G69480	at1:26114112	AT3G29060	at3:11044990	WGD
AT1G69530	at1:26141836	AT2G03090	at2:916854	WGD
AT1G69530	at1:26141836	AT3G29030	at3:11011308	WGD
AT1G69540	at1:26145044	AT2G03060	at2:901143	WGD
AT1G69560	at1:26157755	AT2G02820	at2:804890	WGD
AT1G69560	at1:26157755	AT3G29020	at3:11008614	WGD
AT1G69600	at1:26182470	AT3G28920	at3:10940446	WGD
AT1G69600	at1:26182470	AT5G15210	at5:4937579	WGD
AT1G69620	at1:26189836	AT3G28900	at3:10902647	WGD
AT1G69780	at1:26258939	AT5G15150	at5:4913699	WGD
AT1G69790	at1:26266609	AT2G02800	at2:795515	WGD
AT1G69810	at1:26277238	AT5G15130	at5:4904347	WGD
AT1G70030	at1:26378794	AT5G15020	at5:4859127	WGD
AT1G70280	at1:26465893	AT5G14890	at5:4817949	WGD
AT1G70300	at1:26477880	AT5G14880	at5:4814244	WGD
AT1G70410	at1:26533926	AT5G14740	at5:4757972	WGD
AT1G70430	at1:26545414	AT5G14720	at5:4747860	WGD
AT1G70460	at1:26555846	AT2G01820	at2:357431	WGD
AT1G70490	at1:26563924	AT5G14670	at5:4729319	WGD
AT1G70690	at1:26652013	AT2G01660	at2:290603	WGD
AT1G70720	at1:26666408	AT2G01610	at2:273917	WGD
AT1G70790	at1:26700584	AT2G01540	at2:242123	WGD
AT1G70920	at1:26735956	AT2G01430	at2:187798	WGD
AT1G70940	at1:26743054	AT2G01420	at2:180105	WGD
AT1G71015	at1:26789236	AT2G01340	at2:163954	WGD
AT1G71100	at1:26814632	AT2G01290	at2:148919	WGD
AT1G71530	at1:26939567	AT4G10010	at4:6263597	WGD
AT1G71690	at1:26947765	AT4G09990	at4:6258880	WGD
AT1G71692	at1:26952645	AT4G09960	at4:6236485	WGD
AT1G71697	at1:26971223	AT4G09760	at4:6148758	WGD
AT1G71900	at1:27061486	AT4G09640	at4:6088213	WGD
AT1G71940	at1:27078524	AT4G09580	at4:6052352	WGD
AT1G71980	at1:27097903	AT4G09560	at4:6041342	WGD
AT1G72000	at1:27103277	AT4G09510	at4:6021274	WGD
AT1G72310	at1:27225897	AT3G14320	at3:4777731	WGD
AT1G72360	at1:27241807	AT3G14230	at3:4737146	WGD
AT1G72416	at1:27258839	AT3G14200	at3:4712574	WGD
AT1G72470	at1:27283693	AT3G14090	at3:4669253	WGD
AT1G72700	at1:27365896	AT3G13900	at3:4586151	WGD
AT1G72960	at1:27446236	AT3G13870	at3:4565412	WGD
AT1G72980	at1:27456043	AT3G13850	at3:4559908	WGD
AT1G72990	at1:27457266	AT3G13750	at3:4510965	WGD
AT1G73450	at1:27613856	AT3G17750	at3:6073769	WGD
AT1G73580	at1:27654841	AT3G17980	at3:6152121	WGD
AT1G73600	at1:27669152	AT3G18000	at3:6154363	WGD
AT1G73670	at1:27700050	AT3G18040	at3:6174719	WGD
AT1G73770	at1:27742128	AT3G18240	at3:6255742	WGD
AT1G73780	at1:27743872	AT3G18280	at3:6267049	WGD
AT1G73875	at1:27781006	AT3G18500	at3:6352477	WGD
AT1G75000	at1:28163650	AT4G36830	at4:17349436	WGD
AT1G75080	at1:28185504	AT4G36780	at4:17332517	WGD
AT1G75170	at1:28213799	AT4G36640	at4:17277187	WGD
AT1G75240	at1:28241072	AT2G18350	at2:7971017	WGD
AT1G75250	at1:28245073	AT2G18328	at2:7964393	WGD
AT1G75250	at1:28245073	AT2G21650	at2:9259583	WGD
AT1G75250	at1:28245073	AT4G36570	at4:17254660	WGD
AT1G75250	at1:28245073	AT4G39250	at4:18271457	WGD
AT1G75280	at1:28251960	AT4G39230	at4:18265885	WGD
AT1G75310	at1:28261004	AT4G36520	at4:17230589	WGD
AT1G75370	at1:28276426	AT2G18180	at2:7911054	WGD
AT1G75370	at1:28276426	AT2G21520	at2:9215519	WGD
AT1G75370	at1:28276426	AT4G36490	at4:17221996	WGD
AT1G75370	at1:28276426	AT4G39170	at4:18240605	WGD
AT1G75388	at1:28291698	AT2G18162	at2:7898012	WGD
AT1G75390	at1:28291698	AT2G18160	at2:7898012	WGD
AT1G75400	at1:28296919	AT2G21500	at2:9207669	WGD
AT1G75400	at1:28296919	AT4G39140	at4:18229331	WGD
AT1G75440	at1:28313487	AT4G36410	at4:17201922	WGD
AT1G75520	at1:28351562	AT2G18120	at2:7876615	WGD
AT1G75520	at1:28351562	AT2G21400	at2:9158390	WGD
AT1G75520	at1:28351562	AT4G36260	at4:17155556	WGD
AT1G75540	at1:28366027	AT2G21320	at2:9126263	WGD
AT1G75540	at1:28366027	AT4G38960	at4:18161514	WGD
AT1G75580	at1:28377461	AT2G18010	at2:7833902	WGD
AT1G75580	at1:28377461	AT2G21220	at2:9089326	WGD
AT1G75630	at1:28400608	AT4G38920	at4:18147211	WGD
AT1G75640	at1:28403466	AT4G36180	at4:17120085	WGD
AT1G75720	at1:28434648	AT2G17940	at2:7802825	WGD
AT1G75760	at1:28446632	AT2G21190	at2:9080865	WGD
AT1G75760	at1:28446632	AT4G38790	at4:18111361	WGD
AT1G75800	at1:28458782	AT2G17860	at2:7762257	WGD
AT1G75800	at1:28458782	AT4G36000	at4:17037583	WGD
AT1G75800	at1:28458782	AT4G38660	at4:18066177	WGD
AT1G75840	at1:28475707	AT2G17800	at2:7739856	WGD
AT1G75840	at1:28475707	AT4G35950	at4:17023837	WGD
AT1G75850	at1:28477768	AT2G17790	at2:7733635	WGD
AT1G76030	at1:28533798	AT4G38510	at4:18010812	WGD
AT1G76160	at1:28577942	AT4G38420	at4:17982774	WGD
AT1G76210	at1:28594950	AT2G17070	at2:7430863	WGD
AT1G76270	at1:28613207	AT4G38390	at4:17975776	WGD
AT1G76350	at1:28639577	AT2G17150	at2:7466841	WGD
AT1G76350	at1:28639577	AT4G38340	at4:17954710	WGD
AT1G76360	at1:28643038	AT2G17220	at2:7487654	WGD
AT1G76490	at1:28695760	AT2G17370	at2:7549775	WGD
AT1G76510	at1:28708715	AT2G17410	at2:7558998	WGD
AT1G76520	at1:28715078	AT2G17500	at2:7606759	WGD
AT1G77230	at1:29016120	AT4G08320	at4:5252811	WGD
AT1G77490	at1:29117542	AT4G08390	at4:5314905	WGD
AT1G77720	at1:29210521	AT4G08470	at4:5383852	WGD
AT1G77890	at1:29292190	AT4G08540	at4:5433645	WGD
AT1G77990	at1:29317899	AT4G08620	at4:5500313	WGD
AT1G78040	at1:29345838	AT4G08685	at4:5550429	WGD
AT1G78160	at1:29407900	AT4G08840	at4:5631298	WGD
AT1G78170	at1:29414059	AT4G08910	at4:5712346	WGD
AT1G78300	at1:29461671	AT4G09000	at4:5775210	WGD
AT1G78980	at1:29707687	AT3G13065	at3:4187371	WGD
AT1G79000	at1:29716350	AT3G12980	at3:4146499	WGD
AT1G79060	at1:29741748	AT3G12970	at3:4141051	WGD
AT1G79110	at1:29759157	AT3G12920	at3:4121883	WGD
AT1G79130	at1:29771278	AT3G12830	at3:4078651	WGD
AT1G79180	at1:29786495	AT3G12820	at3:4074158	WGD
AT1G79250	at1:29810134	AT3G12690	at3:4030455	WGD
AT1G79780	at1:30015873	AT3G16300	at3:5525491	WGD
AT1G79860	at1:30042092	AT3G16130	at3:5466246	WGD
AT1G79990	at1:30085781	AT3G15980	at3:5411292	WGD
AT1G80120	at1:30139101	AT3G15810	at3:5347822	WGD
AT1G80140	at1:30146611	AT3G15720	at3:5325290	WGD
AT1G80230	at1:30169456	AT3G15640	at3:5299110	WGD
AT1G80270	at1:30180982	AT3G15590	at3:5275401	WGD
AT2G04520	at2:1574592	AT5G35680	at5:13857921	WGD
AT2G04750	at2:1659762	AT5G35700	at5:13872535	WGD
AT2G04795	at2:1682953	AT5G35732	at5:13897940	WGD
AT2G04850	at2:1704283	AT5G35735	at5:13900752	WGD
AT2G04910	at2:1723980	AT5G35740	at5:13910418	WGD
AT2G05230	at2:1899507	AT5G35753	at5:13922569	WGD
AT2G14120	at2:5953940	AT4G33650	at4:16160935	WGD
AT2G14520	at2:6182193	AT4G33700	at4:16176276	WGD
AT2G14580	at2:6225535	AT4G33710	at4:16181012	WGD
AT2G14690	at2:6283801	AT4G33810	at4:16213324	WGD
AT2G14760	at2:6321587	AT4G33880	at4:16239363	WGD
AT2G14850	at2:6385872	AT4G33890	at4:16249722	WGD
AT2G14860	at2:6387624	AT4G33905	at4:16253815	WGD
AT2G14880	at2:6393332	AT4G34290	at4:16410832	WGD
AT2G15000	at2:6480917	AT4G34265	at4:16402280	WGD
AT2G15090	at2:6542256	AT4G34250	at4:16394708	WGD
AT2G15300	at2:6649630	AT4G34220	at4:16381506	WGD
AT2G15480	at2:6758681	AT4G34131	at4:16343057	WGD
AT2G15500	at2:6763707	AT4G34110	at4:16336387	WGD
AT2G15530	at2:6772914	AT4G34040	at4:16304280	WGD
AT2G15590	at2:6801943	AT4G33985	at4:16288112	WGD
AT2G15770	at2:6871257	AT4G33930	at4:16264389	WGD
AT2G15770	at2:6871257	AT4G34300	at4:16412773	WGD
AT2G16090	at2:6986834	AT4G34370	at4:16434280	WGD
AT2G16200	at2:7024607	AT4G34450	at4:16471835	WGD
AT2G16230	at2:7035463	AT4G34480	at4:16480934	WGD
AT2G16250	at2:7039682	AT4G39270	at4:18276505	WGD
AT2G16280	at2:7050944	AT4G34510	at4:16491796	WGD
AT2G16360	at2:7076713	AT2G21580	at2:9236553	WGD
AT2G16360	at2:7076713	AT4G34555	at4:16504230	WGD
AT2G16360	at2:7076713	AT4G39200	at4:18257336	WGD
AT2G16365	at2:7074527	AT4G34550	at4:16503201	WGD
AT2G16370	at2:7081783	AT2G21550	at2:9227209	WGD
AT2G16370	at2:7081783	AT4G34570	at4:16511001	WGD
AT2G16380	at2:7085784	AT2G21540	at2:9220556	WGD
AT2G16380	at2:7085784	AT4G34580	at4:16515327	WGD
AT2G16380	at2:7085784	AT4G39180	at4:18243774	WGD
AT2G16385	at2:7094799	AT4G34600	at4:16529225	WGD
AT2G16390	at2:7097280	AT2G21450	at2:9179410	WGD
AT2G16400	at2:7101330	AT4G34610	at4:16530346	WGD
AT2G16500	at2:7150622	AT4G34710	at4:16560062	WGD
AT2G16510	at2:7159629	AT4G34720	at4:16567824	WGD
AT2G16510	at2:7159629	AT4G38920	at4:18147211	WGD
AT2G16570	at2:7180145	AT4G34740	at4:16574577	WGD
AT2G16570	at2:7180145	AT4G38880	at4:18134116	WGD
AT2G16580	at2:7184422	AT2G21220	at2:9089326	WGD
AT2G16580	at2:7184422	AT4G34760	at4:16582183	WGD
AT2G16580	at2:7184422	AT4G38860	at4:18130268	WGD
AT2G16595	at2:7198127	AT2G21160	at2:9068318	WGD
AT2G16600	at2:7200807	AT2G21130	at2:9055398	WGD
AT2G16600	at2:7200807	AT4G34870	at4:16614327	WGD
AT2G16600	at2:7200807	AT4G38740	at4:18083395	WGD
AT2G16660	at2:7218706	AT4G34950	at4:16642316	WGD
AT2G16700	at2:7244608	AT4G34970	at4:16653704	WGD
AT2G16720	at2:7255529	AT4G34990	at4:16661329	WGD
AT2G16720	at2:7255529	AT4G38620	at4:18053551	WGD
AT2G16730	at2:7261830	AT4G35010	at4:16667930	WGD
AT2G16730	at2:7261830	AT4G38590	at4:18036092	WGD
AT2G16750	at2:7271012	AT4G35030	at4:16676124	WGD
AT2G16770	at2:7279431	AT4G35040	at4:16680323	WGD
AT2G16780	at2:7281462	AT4G35050	at4:16682580	WGD
AT2G16800	at2:7285736	AT4G35080	at4:16698334	WGD
AT2G16850	at2:7301581	AT4G35100	at4:16708552	WGD
AT2G16900	at2:7323707	AT4G35110	at4:16712466	WGD
AT2G16900	at2:7323707	AT4G38550	at4:18025635	WGD
AT2G17043	at2:7409063	AT4G35200	at4:16749142	WGD
AT2G17090	at2:7435088	AT4G35230	at4:16755112	WGD
AT2G17110	at2:7442980	AT4G35240	at4:16760949	WGD
AT2G17130	at2:7460814	AT4G35260	at4:16774195	WGD
AT2G17150	at2:7466841	AT4G35270	at4:16777338	WGD
AT2G17180	at2:7476835	AT4G35280	at4:16787429	WGD
AT2G17260	at2:7504756	AT4G35290	at4:16789549	WGD
AT2G17265	at2:7508588	AT4G35295	at4:16795333	WGD
AT2G17290	at2:7516415	AT4G35310	at4:16801987	WGD
AT2G17300	at2:7522401	AT4G35320	at4:16805869	WGD
AT2G17320	at2:7533480	AT4G35360	at4:16812116	WGD
AT2G17380	at2:7553002	AT4G35410	at4:16832481	WGD
AT2G17390	at2:7555630	AT4G35450	at4:16839545	WGD
AT2G17420	at2:7564345	AT4G35460	at4:16842188	WGD
AT2G17430	at2:7568018	AT5G65970	at5:26387428	WGD
AT2G17440	at2:7571140	AT4G35470	at4:16846301	WGD
AT2G17450	at2:7576474	AT4G35480	at4:16852074	WGD
AT2G17500	at2:7606759	AT5G65980	at5:26392444	WGD
AT2G17530	at2:7626359	AT4G35500	at4:16857353	WGD
AT2G17540	at2:7630662	AT4G35510	at4:16860452	WGD
AT2G17560	at2:7642165	AT4G35570	at4:16887165	WGD
AT2G17620	at2:7664103	AT4G35620	at4:16901621	WGD
AT2G17630	at2:7666585	AT4G35630	at4:16904059	WGD
AT2G17640	at2:7668078	AT4G35640	at4:16905579	WGD
AT2G17660	at2:7673282	AT4G35655	at4:16910755	WGD
AT2G17680	at2:7679008	AT4G35200	at4:16749142	WGD
AT2G17680	at2:7679008	AT4G35690	at4:16921803	WGD
AT2G17700	at2:7685388	AT4G35780	at4:16946521	WGD
AT2G17720	at2:7697336	AT4G35810	at4:16968921	WGD
AT2G17720	at2:7697336	AT5G66060	at5:26419481	WGD
AT2G17730	at2:7703856	AT4G35840	at4:16980961	WGD
AT2G17730	at2:7703856	AT5G66070	at5:26421855	WGD
AT2G17760	at2:7713314	AT3G51330	at3:19053368	WGD
AT2G17760	at2:7713314	AT4G35880	at4:16993339	WGD
AT2G17770	at2:7723103	AT4G35900	at4:17004595	WGD
AT2G17780	at2:7724974	AT4G35920	at4:17011788	WGD
AT2G17787	at2:7731075	AT4G35940	at4:17021572	WGD
AT2G17790	at2:7733635	AT3G51310	at3:19044480	WGD
AT2G17800	at2:7739856	AT3G51290	at3:19039512	WGD
AT2G17800	at2:7739856	AT4G35020	at4:16672192	WGD
AT2G17800	at2:7739856	AT4G35950	at4:17023837	WGD
AT2G17840	at2:7755605	AT3G51250	at3:19028203	WGD
AT2G17840	at2:7755605	AT4G35985	at4:17032268	WGD
AT2G17850	at2:7760005	AT5G66170	at5:26447648	WGD
AT2G17860	at2:7762257	AT4G36010	at4:17039063	WGD
AT2G17870	at2:7763975	AT4G36020	at4:17043112	WGD
AT2G17880	at2:7766962	AT4G36040	at4:17049171	WGD
AT2G17890	at2:7769885	AT4G36070	at4:17056907	WGD
AT2G17890	at2:7769885	AT5G66210	at5:26456292	WGD
AT2G17930	at2:7784288	AT4G36080	at4:17059826	WGD
AT2G17940	at2:7802825	AT3G51220	at3:19021734	WGD
AT2G17970	at2:7818940	AT4G36090	at4:17078311	WGD
AT2G17980	at2:7824166	AT4G36100	at4:17082579	WGD
AT2G17990	at2:7826817	AT4G36105	at4:17083885	WGD
AT2G17990	at2:7826817	AT5G66250	at5:26468533	WGD
AT2G18010	at2:7833902	AT4G34760	at4:16582183	WGD
AT2G18010	at2:7833902	AT4G36110	at4:17089949	WGD
AT2G18020	at2:7837102	AT3G51190	at3:19016606	WGD
AT2G18020	at2:7837102	AT4G36130	at4:17097565	WGD
AT2G18060	at2:7848399	AT4G36160	at4:17110747	WGD
AT2G18060	at2:7848399	AT5G66300	at5:26479793	WGD
AT2G18080	at2:7857198	AT4G36190	at4:17123966	WGD
AT2G18090	at2:7864314	AT3G51120	at3:18985900	WGD
AT2G18100	at2:7867828	AT4G36210	at4:17130246	WGD
AT2G18120	at2:7876615	AT3G51060	at3:18964344	WGD
AT2G18120	at2:7876615	AT4G36260	at4:17155556	WGD
AT2G18120	at2:7876615	AT5G66350	at5:26504467	WGD
AT2G18130	at2:7879308	AT4G36350	at4:17173737	WGD
AT2G18140	at2:7887584	AT3G50990	at3:18943135	WGD
AT2G18140	at2:7887584	AT4G36430	at4:17204478	WGD
AT2G18140	at2:7887584	AT5G66390	at5:26515916	WGD
AT2G18160	at2:7898012	AT4G34590	at4:16521861	WGD
AT2G18170	at2:7907804	AT4G36450	at4:17210245	WGD
AT2G18180	at2:7911054	AT4G34580	at4:16515327	WGD
AT2G18180	at2:7911054	AT4G36490	at4:17221996	WGD
AT2G18190	at2:7914305	AT3G50930	at3:18929526	WGD
AT2G18210	at2:7924958	AT3G50900	at3:18918019	WGD
AT2G18210	at2:7924958	AT4G36500	at4:17225912	WGD
AT2G18300	at2:7952442	AT4G34530	at4:16498391	WGD
AT2G18300	at2:7952442	AT4G36540	at4:17243583	WGD
AT2G18328	at2:7964393	AT4G36570	at4:17254660	WGD
AT2G18330	at2:7965635	AT4G36580	at4:17257945	WGD
AT2G18340	at2:7969444	AT4G36600	at4:17263666	WGD
AT2G18350	at2:7971017	AT3G50890	at3:18916166	WGD
AT2G18360	at2:7976712	AT4G36610	at4:17265390	WGD
AT2G18380	at2:7982868	AT3G50870	at3:18910990	WGD
AT2G18380	at2:7982868	AT4G36620	at4:17268906	WGD
AT2G18470	at2:8005285	AT4G34440	at4:16465828	WGD
AT2G18480	at2:8009323	AT4G36670	at4:17287499	WGD
AT2G18520	at2:8033882	AT4G36680	at4:17292229	WGD
AT2G18540	at2:8042382	AT4G36700	at4:17298200	WGD
AT2G18550	at2:8049663	AT4G36740	at4:17314559	WGD
AT2G18560	at2:8059288	AT3G50740	at3:18855161	WGD
AT2G18560	at2:8059288	AT4G36770	at4:17330146	WGD
AT2G18590	at2:8069945	AT4G36790	at4:17336172	WGD
AT2G18600	at2:8073200	AT4G36800	at4:17340950	WGD
AT2G18620	at2:8078288	AT4G36810	at4:17343374	WGD
AT2G18630	at2:8080503	AT4G34320	at4:16422166	WGD
AT2G18650	at2:8086860	AT4G30400	at4:14866946	WGD
AT2G18650	at2:8086860	AT5G57750	at5:23399668	WGD
AT2G18660	at2:8090658	AT4G30380	at4:14860486	WGD
AT2G18670	at2:8093220	AT4G30370	at4:14858490	WGD
AT2G18730	at2:8118830	AT4G30340	at4:14838291	WGD
AT2G18730	at2:8118830	AT5G57690	at5:23372063	WGD
AT2G18740	at2:8123221	AT4G30330	at4:14836548	WGD
AT2G18750	at2:8125518	AT5G57580	at5:23314716	WGD
AT2G18800	at2:8144912	AT4G30270	at4:14819192	WGD
AT2G18800	at2:8144912	AT5G57550	at5:23304888	WGD
AT2G18840	at2:8158198	AT4G30260	at4:14816622	WGD
AT2G18860	at2:8164241	AT4G30240	at4:14807919	WGD
AT2G18870	at2:8167471	AT4G30200	at4:14786633	WGD
AT2G18876	at2:8169572	AT5G57410	at5:23264896	WGD
AT2G18915	at2:8194572	AT5G57360	at5:23241427	WGD
AT2G18960	at2:8221631	AT4G30190	at4:14770794	WGD
AT2G18960	at2:8221631	AT5G57350	at5:23230879	WGD
AT2G18969	at2:8229047	AT4G30180	at4:14768936	WGD
AT2G18980	at2:8233335	AT4G30170	at4:14762841	WGD
AT2G19010	at2:8243089	AT4G30140	at4:14738387	WGD
AT2G19090	at2:8265178	AT4G30130	at4:14734819	WGD
AT2G19110	at2:8278881	AT4G30110	at4:14720241	WGD
AT2G19120	at2:8287036	AT4G30100	at4:14714191	WGD
AT2G19160	at2:8309816	AT4G25870	at4:13149691	WGD
AT2G19160	at2:8309816	AT4G30060	at4:14689129	WGD
AT2G19160	at2:8309816	AT5G57270	at5:23200614	WGD
AT2G19170	at2:8314005	AT4G30020	at4:14677285	WGD
[truncated: 6,113 more rows]
