# Supplementary material for: In situ dissecting the evolution of gene duplication with different histone modification patterns based on high-throughput data analysis in Arabidopsis thaliana
Source: PeerJ journal article supplement (doi:10.7717/peerj.10426), 2021-01-05
Supplement: Supplementary_file_3_Figures_S1-S5.pdf [file Supplementary_file_3_Figures_S1-S5.pdf]

## Additional file 1

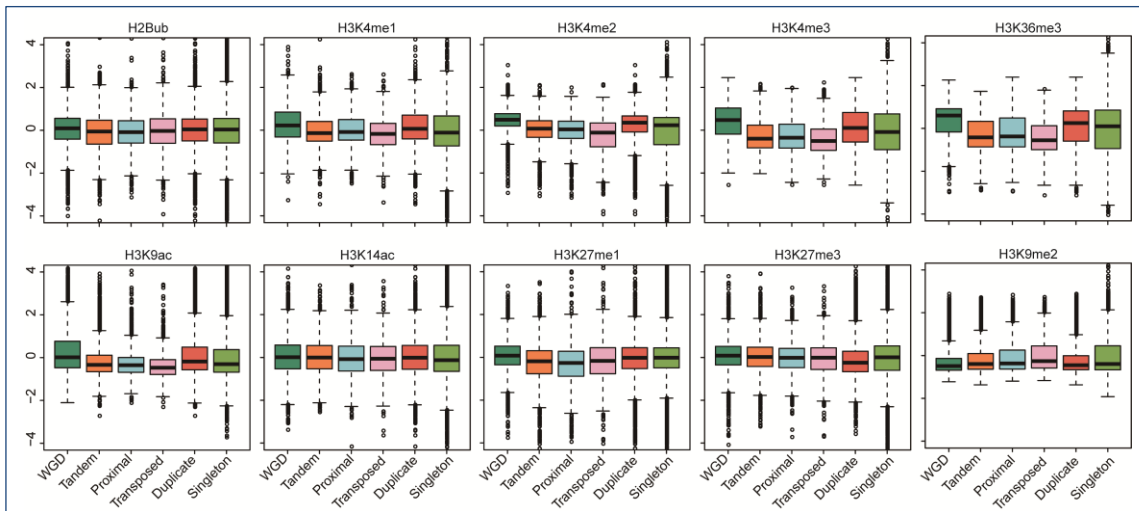

**Fig. S1** Comparison the enriched levels of ten histone modification marks among four types duplicate genes, singleton and all duplicate *Arabidopsis* genes in ORF regions.

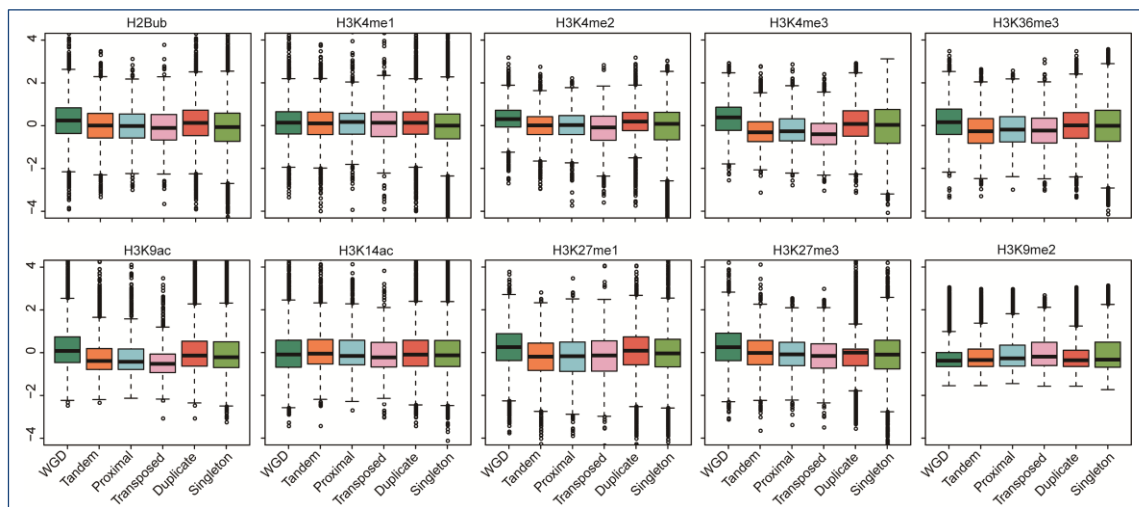

**Fig. S2** Comparison the enriched levels of ten histone modification marks among four types duplicate genes, singleton and all duplicate *A. thaliana* genes in promoter regions.

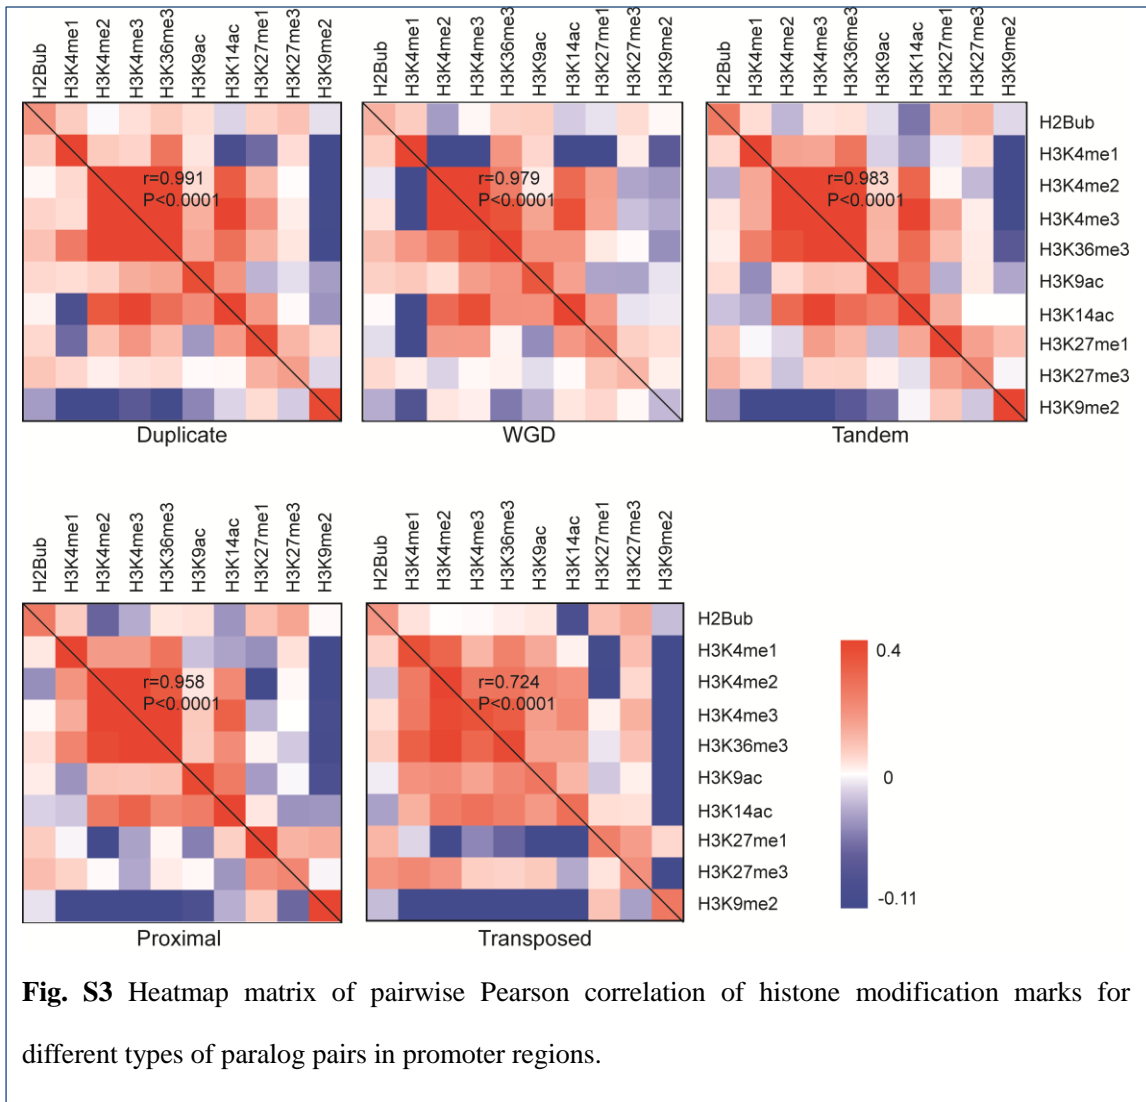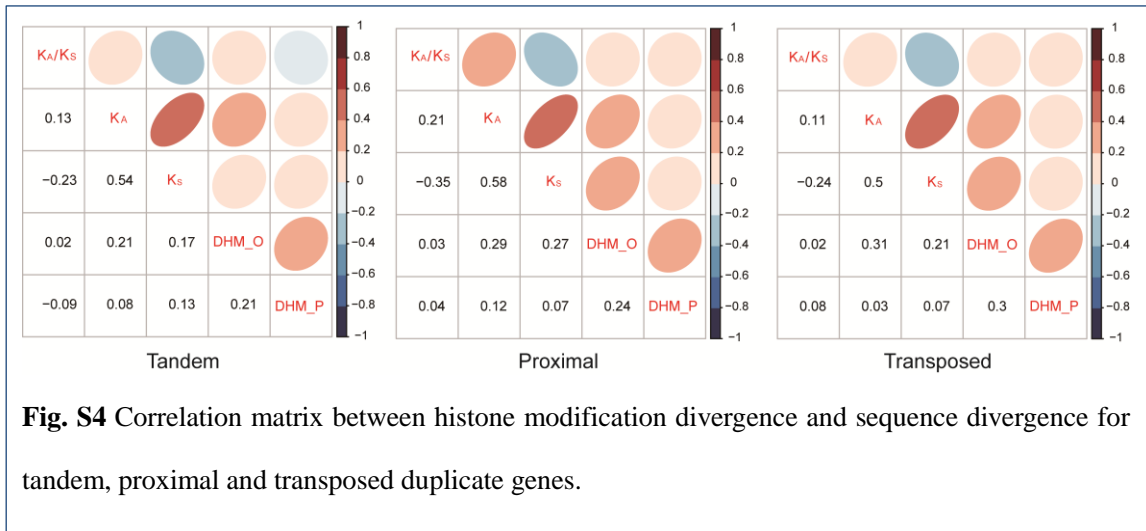

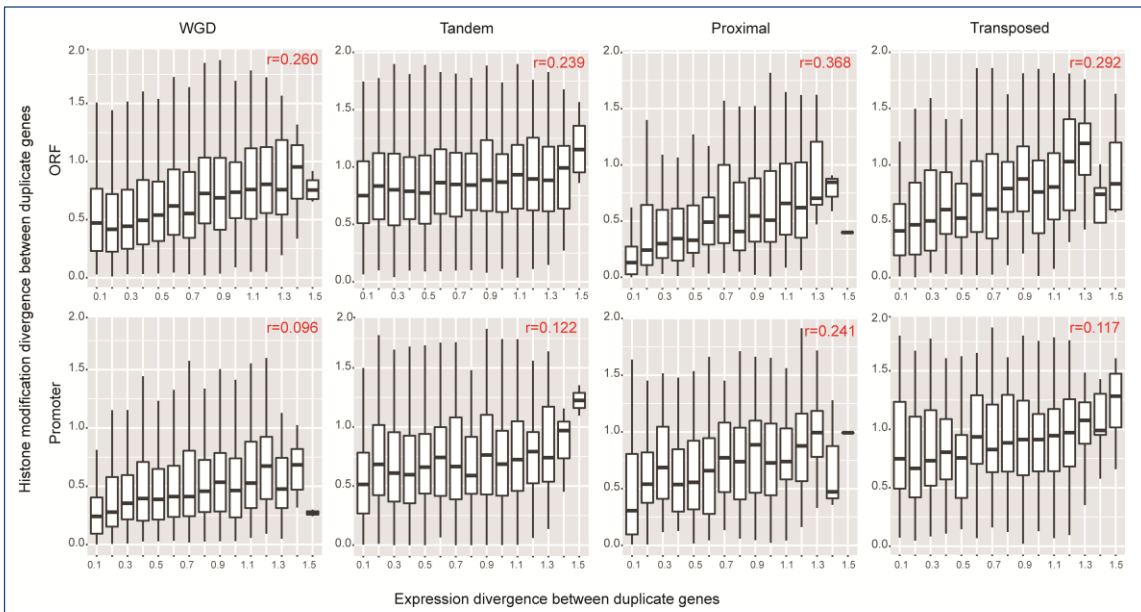

**Fig. S5** Relationship between ORF/promoter histone modification divergence and expression divergence between different types of paralog pairs.
